# Supplementary material for: Sesquiterpenoids and hexanorcucurbitacin from Aquilaria malaccensis agarwood with anti-inflammatory effects by inhibiting the STAT1/AKT/MAPK/NLRP3 pathway
Source: Royal Society of Chemistry journal article supplement (doi:10.1039/d3ra08686k), 2024-01-01
Supplement: d3ra08686k2.pdf [file d3ra08686k2.pdf]

## Supporting Information

### **Sesquiterpenoids and hexanorcucurbitacin from *Aquilaria malaccensis* agarwood with anti-inflammatory effects by inhibiting STAT1/AKT/MAPK/NLRP3 pathway**

Chi Thanh Ma<sup>1,2,⊥</sup>, Tianqi Huang<sup>2,3,⊥</sup>, Jae Sik Yu<sup>2,⊥</sup>, Tu Loan Ly<sup>4</sup>, Kim Long Vu Huynh<sup>4</sup>, Sung Won Kwon<sup>5</sup>, Jeong Hill Park<sup>5</sup>, Hyun Ok Yang<sup>2,\*</sup>

<sup>1</sup> *Faculty of Pharmacy, University of Medicine and Pharmacy at Ho Chi Minh City, 41-43 Dinh Tien Hoang st., dist. 1, Ho Chi Minh city 700000, Vietnam.*

<sup>2</sup> *Department of Integrative Biological Sciences and Industry & Convergence Research Center for Natural Products, Sejong University, 209, Neungdong-ro, Gwangjin-gu, Seoul 05006, Republic of Korea.*

<sup>3</sup> *Korea Institute of Science and Technology (KIST) School, Korea University of Science and Technology (UST), 5 Hwarang-ro 14-gil, Wolgok 2(i)-dong, Seongbuk-gu, Seoul 02792, Republic of Korea.*

<sup>4</sup> *Faculty of Pharmacy, Ton Duc Thang University, Ho Chi Minh city, Vietnam.*

<sup>5</sup> *Research Institute of Pharmaceutical Sciences, College of Pharmacy, Seoul National University, 1 Gwanak-ro, Gwanak-gu, Seoul 08826, Republic of Korea.*

<sup>⊥</sup> These authors contributed equally.

\* Corresponding author: Hyun Ok Yang

Department of Integrative Biological Sciences and Industry, Sejong University  
209, Neungdong-ro, Gwangjin-gu, Seoul 05006, Republic of Korea

Tel: +82-02-3408-1959

Fax: +82-02-3408-4336

E-mail: [hoyang@sejong.ac.kr](mailto:hoyang@sejong.ac.kr)

## TABLE OF CONTENTS

|                                                                                                    |    |
|----------------------------------------------------------------------------------------------------|----|
| Figure S1: <sup>1</sup> H NMR spectrum of compound <b>1</b> in CD <sub>3</sub> OD (800 MHz).....   | 6  |
| Figure S2: <sup>13</sup> C NMR spectrum of compound <b>1</b> in CD <sub>3</sub> OD (800 MHz).....  | 6  |
| Figure S3: HSQC spectrum of compound <b>1</b> in CD <sub>3</sub> OD (800 MHz).....                 | 7  |
| Figure S4: HMBC spectrum of compound <b>1</b> in CD <sub>3</sub> OD (800 MHz).....                 | 7  |
| Figure S5: COSY spectrum of compound <b>1</b> in CD <sub>3</sub> OD (800 MHz).....                 | 8  |
| Figure S6: NOESY spectrum of compound <b>1</b> in CD <sub>3</sub> OD (800 MHz).....                | 8  |
| Figure S7: MS spectrum of compound <b>1</b> .....                                                  | 9  |
| Figure S8: UV spectrum of compound <b>1</b> .....                                                  | 10 |
| Figure S9: CD spectrum of compound <b>1</b> .....                                                  | 10 |
| Figure S10: <sup>1</sup> H NMR spectrum of compound <b>2</b> in CD <sub>3</sub> OD (400 MHz).....  | 11 |
| Figure S11: <sup>13</sup> C NMR spectrum of compound <b>2</b> in CD <sub>3</sub> OD (400 MHz)..... | 11 |
| Figure S12: HSQC spectrum of compound <b>2</b> in CD <sub>3</sub> OD (400 MHz).....                | 12 |
| Figure S13: HMBC spectrum of compound <b>2</b> in CD <sub>3</sub> OD (400 MHz).....                | 12 |
| Figure S14: COSY spectrum of compound <b>2</b> in CD <sub>3</sub> OD (400 MHz) .....               | 13 |
| Figure S15: NOESY spectrum of compound <b>2</b> in CD <sub>3</sub> OD (400 MHz).....               | 13 |
| Figure S16: MS spectrum of compound <b>2</b> .....                                                 | 14 |
| Figure S17: UV spectrum of compound <b>2</b> .....                                                 | 15 |
| Figure S18: Experimental ECD spectrum of compound <b>2</b> .....                                   | 15 |
| Figure S19: <sup>1</sup> H NMR spectrum of compound <b>3</b> in CDCl <sub>3</sub> (800 MHz) .....  | 16 |
| Figure S20: <sup>13</sup> C NMR spectrum of compound <b>3</b> in CDCl <sub>3</sub> (800 MHz).....  | 16 |
| Figure S21: HSQC spectrum of compound <b>3</b> in CDCl <sub>3</sub> (800 MHz) .....                | 17 |
| Figure S22: HMBC spectrum of compound <b>3</b> in CDCl <sub>3</sub> (800 MHz) .....                | 17 |
| Figure S23: COSY spectrum of compound <b>3</b> in CDCl <sub>3</sub> (800 MHz) .....                | 18 |
| Figure S24: NOESY spectrum of compound <b>3</b> in CDCl <sub>3</sub> (800 MHz) .....               | 18 |
| Figure S25: MS spectrum of compound <b>3</b> .....                                                 | 19 |
| Figure S26: UV spectrum of compound <b>3</b> .....                                                 | 20 |
| Figure S27: Experimental ECD spectrum of compound <b>3</b> .....                                   | 20 |
| Figure S28: <sup>1</sup> H NMR spectrum of compound <b>4</b> in CDCl <sub>3</sub> (500 MHz) .....  | 21 |
| Figure S29: <sup>13</sup> C NMR spectrum of compound <b>4</b> in CDCl <sub>3</sub> (500 MHz).....  | 21 |
| Figure S30: HSQC spectrum of compound <b>4</b> in CDCl <sub>3</sub> (500 MHz) .....                | 22 |
| Figure S31: HMBC spectrum of compound <b>4</b> in CDCl <sub>3</sub> (500 MHz) .....                | 22 |
| Figure S32: COSY spectrum of compound <b>4</b> in CDCl <sub>3</sub> (500 MHz) .....                | 23 |
| Figure S33: NOESY spectrum of compound <b>4</b> in CDCl <sub>3</sub> (500 MHz) .....               | 23 |
| Figure S34: MS spectrum of compound <b>4</b> .....                                                 | 24 |
| Figure S35: UV spectrum of compound <b>4</b> .....                                                 | 25 |

|                                                                                                    |    |
|----------------------------------------------------------------------------------------------------|----|
| Figure S36: Experimental ECD spectrum of compound <b>4</b> .....                                   | 25 |
| Figure S37: <sup>1</sup> H NMR spectrum of compound <b>5</b> in CDCl <sub>3</sub> (800 MHz) .....  | 26 |
| Figure S38: <sup>13</sup> C NMR spectrum of compound <b>5</b> in CDCl <sub>3</sub> (800 MHz) ..... | 26 |
| Figure S39: HSQC spectrum of compound <b>5</b> in CDCl <sub>3</sub> (800 MHz) .....                | 27 |
| Figure S40: HMBC spectrum of compound <b>5</b> in CDCl <sub>3</sub> (800 MHz) .....                | 27 |
| Figure S41: COSY spectrum of compound <b>5</b> in CDCl <sub>3</sub> (800 MHz) .....                | 28 |
| Figure S42: NOESY spectrum of compound <b>5</b> in CDCl <sub>3</sub> (800 MHz) .....               | 28 |
| Figure S43: MS spectrum of compound <b>5</b> .....                                                 | 29 |
| Figure S44: UV spectrum of compound <b>5</b> .....                                                 | 30 |
| Figure S45: Experimental ECD spectrum of compound <b>5</b> .....                                   | 30 |
| Figure S46: <sup>1</sup> H NMR spectrum of compound <b>6</b> in CDCl <sub>3</sub> (800 MHz) .....  | 31 |
| Figure S47: <sup>13</sup> C NMR spectrum of compound <b>6</b> in CDCl <sub>3</sub> (800 MHz) ..... | 31 |
| Figure S48: HSQC spectrum of compound <b>6</b> in CDCl <sub>3</sub> (800 MHz) .....                | 32 |
| Figure S49: HMBC spectrum of compound <b>6</b> in CDCl <sub>3</sub> (800 MHz) .....                | 32 |
| Figure S50: COSY spectrum of compound <b>6</b> in CDCl <sub>3</sub> (800 MHz) .....                | 33 |
| Figure S51: NOESY spectrum of compound <b>6</b> in CDCl <sub>3</sub> (800 MHz) .....               | 33 |
| Figure S52: MS spectrum of compound <b>6</b> .....                                                 | 34 |
| Figure S53: UV spectrum of compound <b>6</b> .....                                                 | 35 |
| Figure S54: Experimental ECD spectrum of compound <b>6</b> .....                                   | 35 |
| Figure S55: <sup>1</sup> H NMR spectrum of compound <b>7</b> in CDCl <sub>3</sub> (800 MHz) .....  | 36 |
| Figure S56: <sup>13</sup> C NMR spectrum of compound <b>7</b> in CDCl <sub>3</sub> (800 MHz) ..... | 36 |
| Figure S57: HSQC spectrum of compound <b>7</b> in CDCl <sub>3</sub> (800 MHz) .....                | 37 |
| Figure S58: HMBC spectrum of compound <b>7</b> in CDCl <sub>3</sub> (800 MHz) .....                | 38 |
| Figure S59: COSY spectrum of compound <b>7</b> in CDCl <sub>3</sub> (800 MHz) .....                | 39 |
| Figure S60: NOESY spectrum of compound <b>7</b> in CDCl <sub>3</sub> (800 MHz) .....               | 40 |
| Figure S61: MS spectrum of compound <b>7</b> .....                                                 | 41 |
| Figure S62: UV spectrum of compound <b>7</b> .....                                                 | 42 |
| Table S1. Boltzmann distribution of conformers <b>1</b> .....                                      | 43 |
| Table S2. Boltzmann distribution of conformers <b>2</b> .....                                      | 43 |
| Table S3. Boltzmann distribution of conformers <b>3</b> .....                                      | 44 |
| Table S4. Boltzmann distribution of conformers <b>4</b> .....                                      | 44 |
| Table S5. Boltzmann distribution of conformers <b>5</b> .....                                      | 45 |
| Table S6. Boltzmann distribution of conformers <b>6</b> .....                                      | 45 |
| Table S7. Crystal data and structure refinement for <b>7</b> .....                                 | 46 |

## **1. Plant material**

The agarwood chips of *A. malaccensis* was purchased from Industrial Plantation Co. (Vientiane, Laos) in January 2010. A voucher specimen (AM-2010-01) was authenticated by Professor Jeong Hill Park (Natural Products Research Institute, Seoul National University) and deposited at the Herbarium of the Natural Product Research Institute, Seoul National University, Korea.

## **2. Extraction and isolation**

The agarwood chips of *A. malaccensis* (9.0 kg) was ground and extracted with 70% MeOH under reflux (20 L X 3h, 3 times). The solvent was evaporated under reduced pressure to obtain a crude extract (864 g), which was suspended in water and successively partitioned with diethyl ether, EtOAc, *n*-BuOH, achieving 225, 155, and 289 g of residue, respectively.

The diethyl ether fraction (30 g) was applied on a silica gel column (230-400 mesh, 300 g), eluted with *n*-hexane/EtOAc (gradient 40:1 → 1:1, v/v) to obtain 7 fractions (DE1-DE7). Fraction DE2 was separated by a silica gel column chromatography (CC) (*n*-hexane/EtOAc, gradient 20:1 to 8:2, v/v) to afford 4 fractions (DE2.1-DE2.4). Fraction DE2.3 was applied to a silica gel CC, eluted with *n*-hexane/EtOAc (95:5 to 7:3, v/v) to obtain 3 fractions (DE2.3.1-DE2.3.3). Fraction DE2.3.2 was separated by semi-preparative RP-HPLC (MeOH/H<sub>2</sub>O, 65:35, v/v) to give **10** (4.29 mg) and **12** (30.4). Fraction DE3 (3.36 g) was further subjected to a silica gel CC (*n*-hexane/EtOAc, gradient 95:5 to 7:3, v/v) to achieve 9 sub-fractions (DE3.1-DE3.9). Fraction DE3.3 (450 mg) was subjected to semi-preparative RP-HPLC (MeOH/H<sub>2</sub>O, 65:35, v/v) and then purified by Sephadex LH-20 CC (MeOH) to yield **14** (72.9 mg). Fraction DE3.4 (237 mg) was applied to a Sephadex LH-20 CC (MeOH) to furnish 5 sub-fractions (DE3.4.1-DE3.4.5). Fraction 3.4.3 (81.7 mg) was further isolated by using semi-preparative RP-HPLC (CH<sub>3</sub>CN/H<sub>2</sub>O, 45:55, v/v) to obtain **2** (3.5 mg), and **8** (23.5 mg), respectively. Compounds **9** (4.5 mg) and **15** (4.8 mg) were obtained from fraction DE3.4.5

(71.5 mg) by semi-preparative RP-HPLC (MeOH/H<sub>2</sub>O, 65:35, v/v). Fraction DE3.5 was loaded on a Sephadex LH-20 CC (MeOH) to give 5 sub-fractions (DE3.5.1-DE3.5.5). By using semi-preparative RP-HPLC (MeOH/H<sub>2</sub>O, 65:35, v/v), compounds **4** (6.7 mg) and **13** (15.8 mg) were obtained from fraction DE3.5.3 (118.2 mg) and DE3.5.4 (87.2 mg), respectively. Fraction DE4 (7.6 g) was applied to a silica gel CC (*n*-hexane/EtOAc, gradient 95:5 to 1:1, v/v) to obtain 10 sub-fractions (DE4.1 – DE4.10). Compounds **1** (1.0 mg) and **3** (3.3 mg) were obtained from fraction DE4.5 (96.8 mg) by semi-preparative RP-HPLC (CH<sub>3</sub>CN/H<sub>2</sub>O, 35:65, v/v). Fraction DE4.6 (781 mg) was isolated and purified by semi-preparative RP-HPLC (MeOH/H<sub>2</sub>O, 65:35, v/v) to obtain **5** (2.08 mg), and **11** (10.3 mg). .

The EtOAc fraction (51.5 g) was separated by a silica gel CC (*n*-hexane/EtOAc, gradient 200:1 to 1:1, v/v) to afford 5 fractions (EA1-EA5). Fraction EA2 (20 g) was continuously fractionated by a silica gel CC (*n*-hexane/EtOAc, gradient 95:5 to 1:1, v/v) to achieve 17 fractions (EA2.1-EA2.17). Fraction EA2.10 was separated to a Sephadex LH-20 (MeOH) column to yield 3 fractions (EA2.10.1-EA2.10.3). Compounds **6** (5.19 mg) and **7** (2.6 mg) were achieved from fractions EA2.10.1 by semi-preparative RP-HPLC (MeOH/H<sub>2</sub>O, 65:35, v/v). By crystallization method in MeOH, compound **16** (125.8 mg) was obtained from fraction EA2.14.

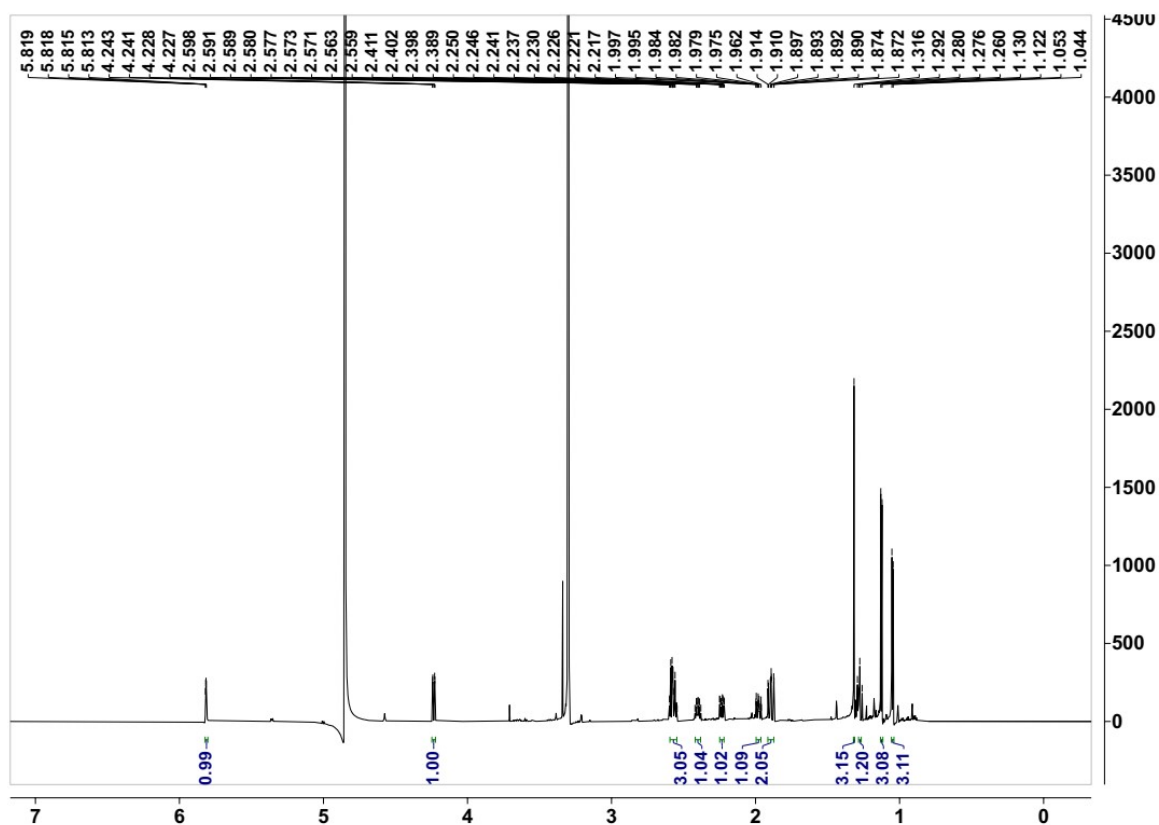

Figure S1. <sup>1</sup>H NMR spectrum of compound **1** in CD<sub>3</sub>OD (800 MHz)

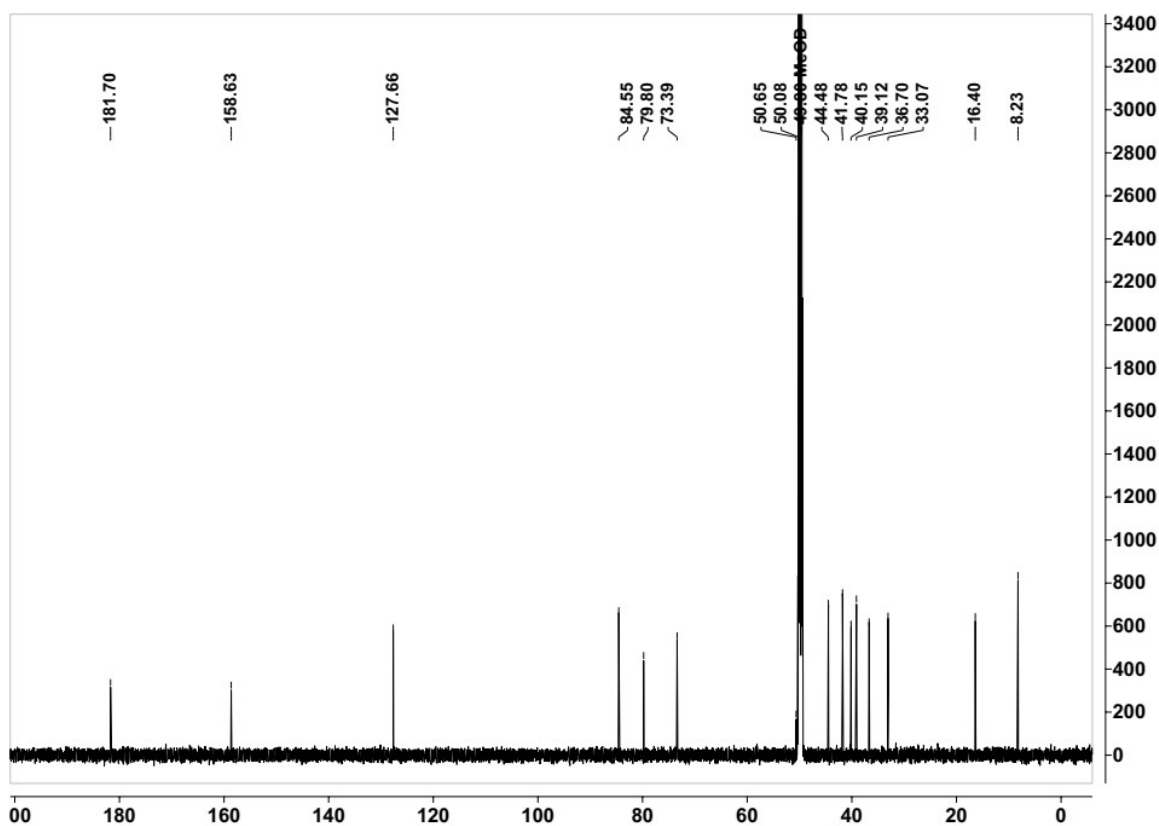

Figure S2. <sup>13</sup>C NMR spectrum of compound **1** in CD<sub>3</sub>OD (800 MHz)

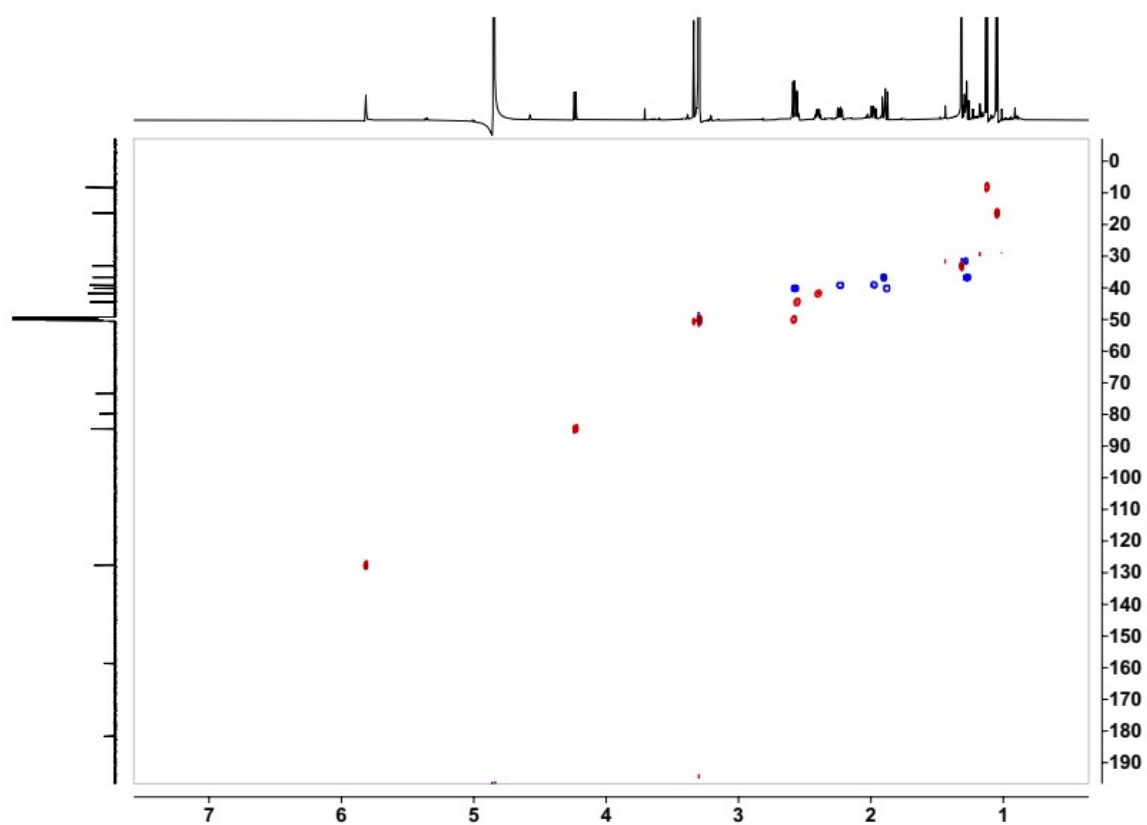

Figure S3: HSQC spectrum of compound **1** in CD<sub>3</sub>OD (800 MHz)

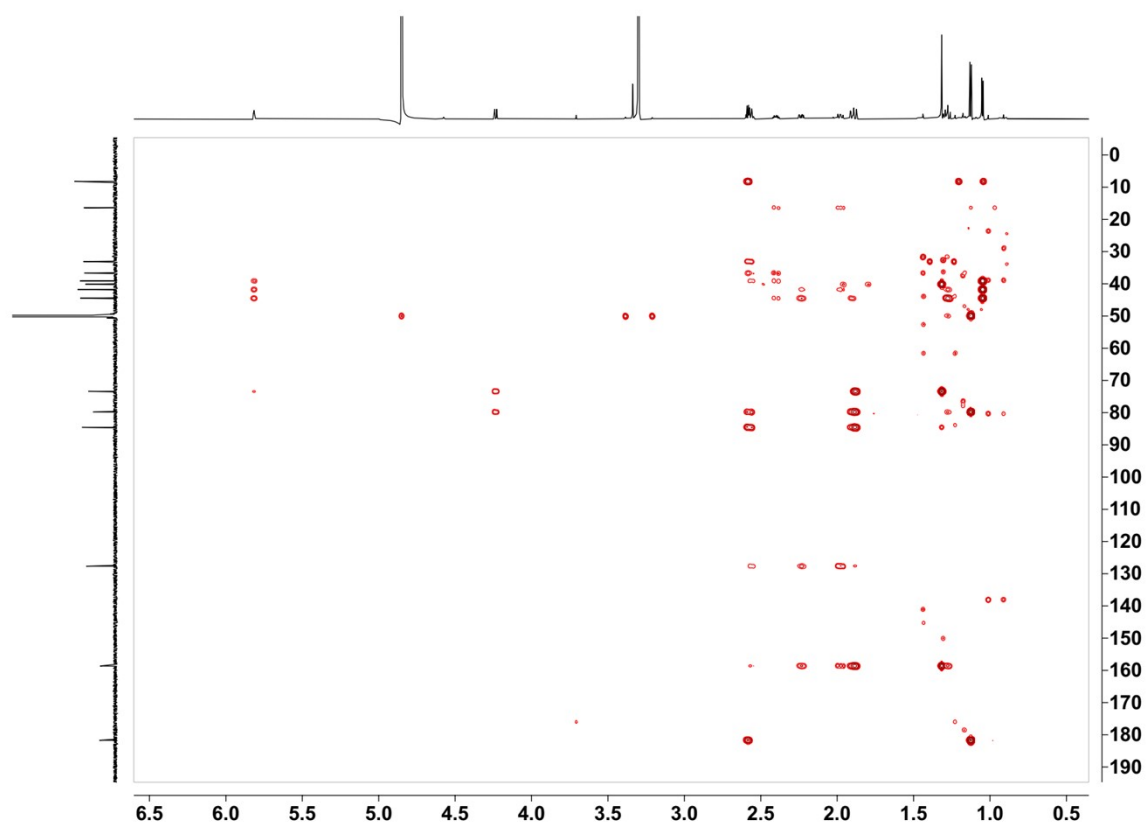

Figure S4: HMBC spectrum of compound **1** in CD<sub>3</sub>OD (800 MHz)

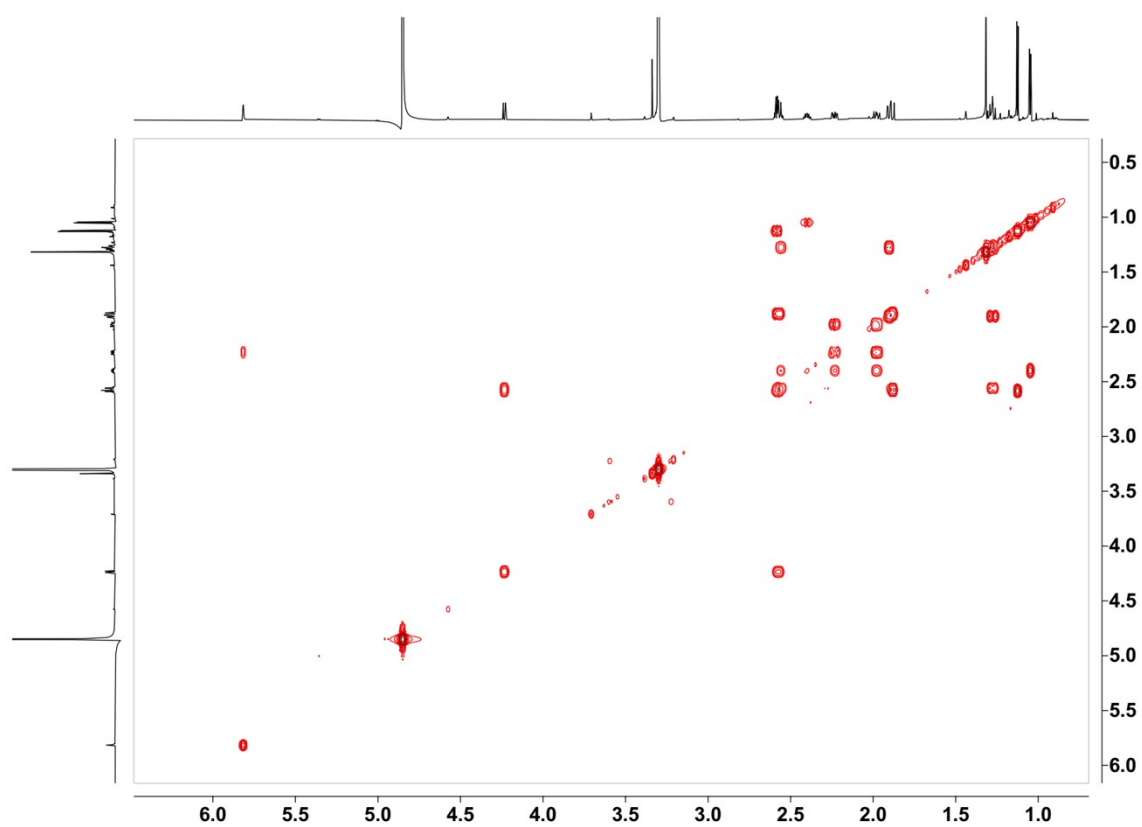

Figure S5: COSY spectrum of compound **1** in CD<sub>3</sub>OD (800 MHz)

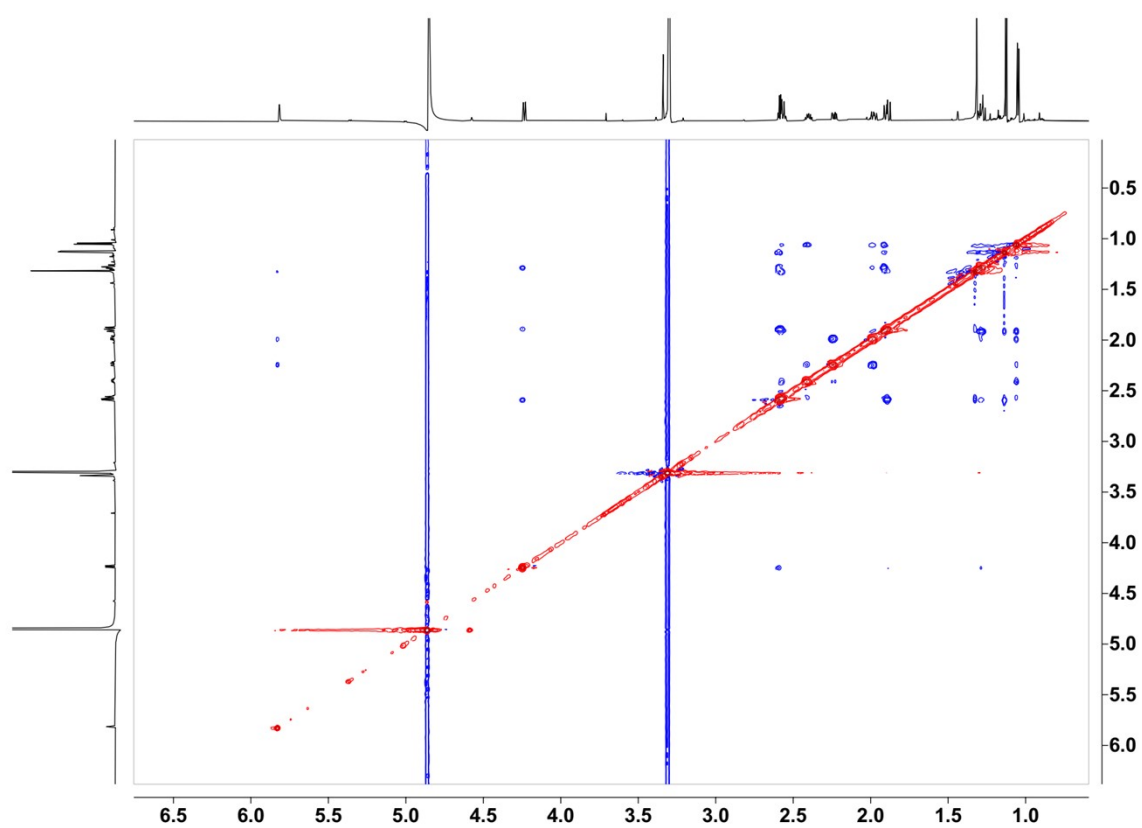

Figure S6: NOESY spectrum of compound **1** in CD<sub>3</sub>OD (800 MHz)

# Compound Table

| Compound Label  | RT    | Mass     | Abund | Formula  | Tgt Mass | Diff (ppm) |
|-----------------|-------|----------|-------|----------|----------|------------|
| Cpd 1: C15H20O3 | 0.192 | 248.1407 | 70577 | C15H20O3 | 248.1412 | -2.06      |

| Compound Label  | RT    | Algorithm       | Mass     |
|-----------------|-------|-----------------|----------|
| Cpd 1: C15H20O3 | 0.192 | Find By Formula | 248.1407 |

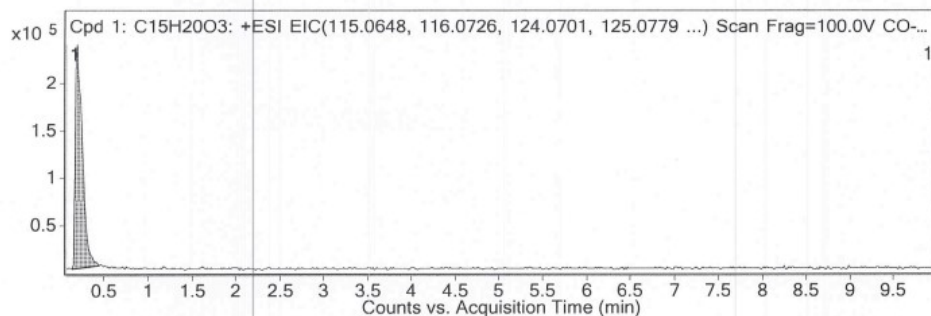

## MS Spectrum

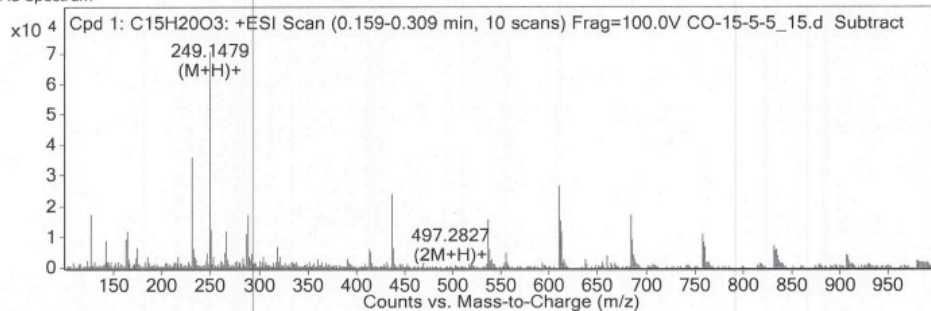

## Qualitative Compound Report

### MS Zoomed Spectrum

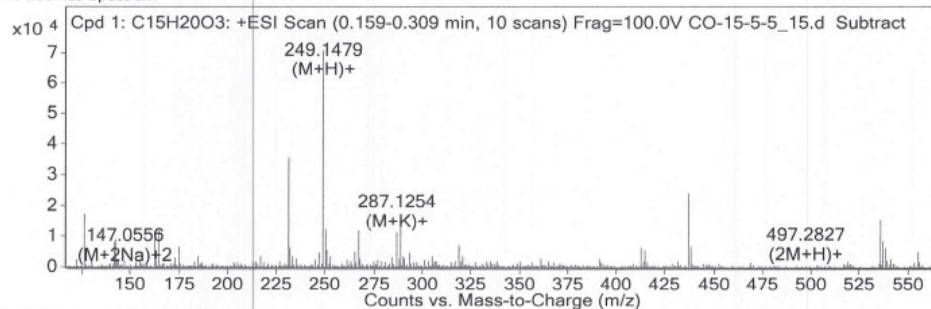

### MS Spectrum Peak List

| m/z      | Calc m/z | Diff(ppm) | z | Abund | Formula        | Ion            |
|----------|----------|-----------|---|-------|----------------|----------------|
| 147.0556 | 147.0598 | -28.94    | 2 | 187   | C15 H20 Na2 O3 | (M+2Na)+2      |
| 231.1375 | 231.138  | -2.05     | 1 | 35872 | C15 H19 O2     | (M+H)+[-H2O]   |
| 248.1365 | 248.1407 | -17.04    |   | 1181  | C15 H20 O3     | M*+            |
| 248.1648 | 248.1645 | 1.27      |   | 584   | C15 H22 N O2   | (M+NH4)+[-H2O] |
| 249.1479 | 249.1485 | -2.45     |   | 70577 | C15 H21 O3     | (M+H)+         |
| 266.1662 | 266.1751 | -33.46    | 1 | 1339  | C15 H24 N O3   | (M+NH4)+       |
| 271.135  | 271.1305 | 16.68     | 1 | 608   | C15 H20 Na O3  | (M+Na)+        |
| 287.1254 | 287.1044 | 73.06     | 1 | 10956 | C15 H20 K O3   | (M+K)+         |
| 497.2827 | 497.2898 | -14.3     | 1 | 448   | C30 H41 O6     | (2M+H)+        |
| 517.2287 | 517.2351 | -12.38    | 1 | 379   | C30 H38 K O5   | (2M+K)+[-H2O]  |

--- End Of Report ---

Figure S7: MS spectrum of compound 1

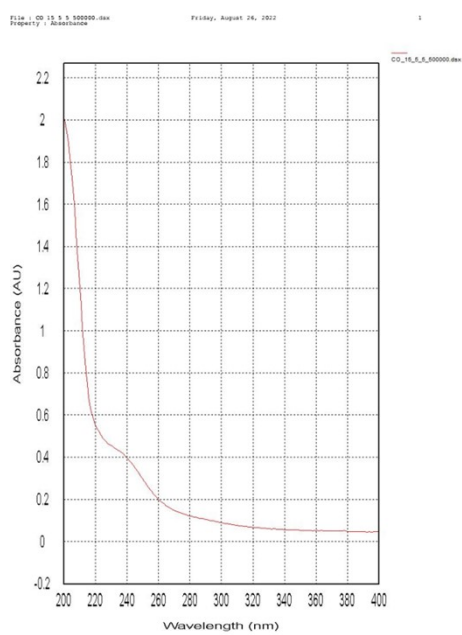

Figure S8: UV spectrum of compound **1**

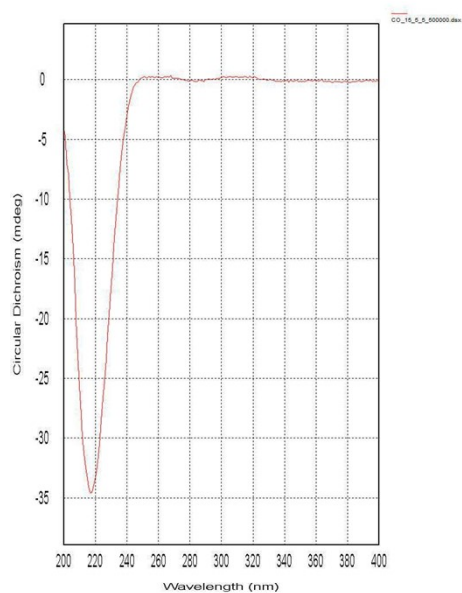

Figure S9: CD spectrum of compound **1**

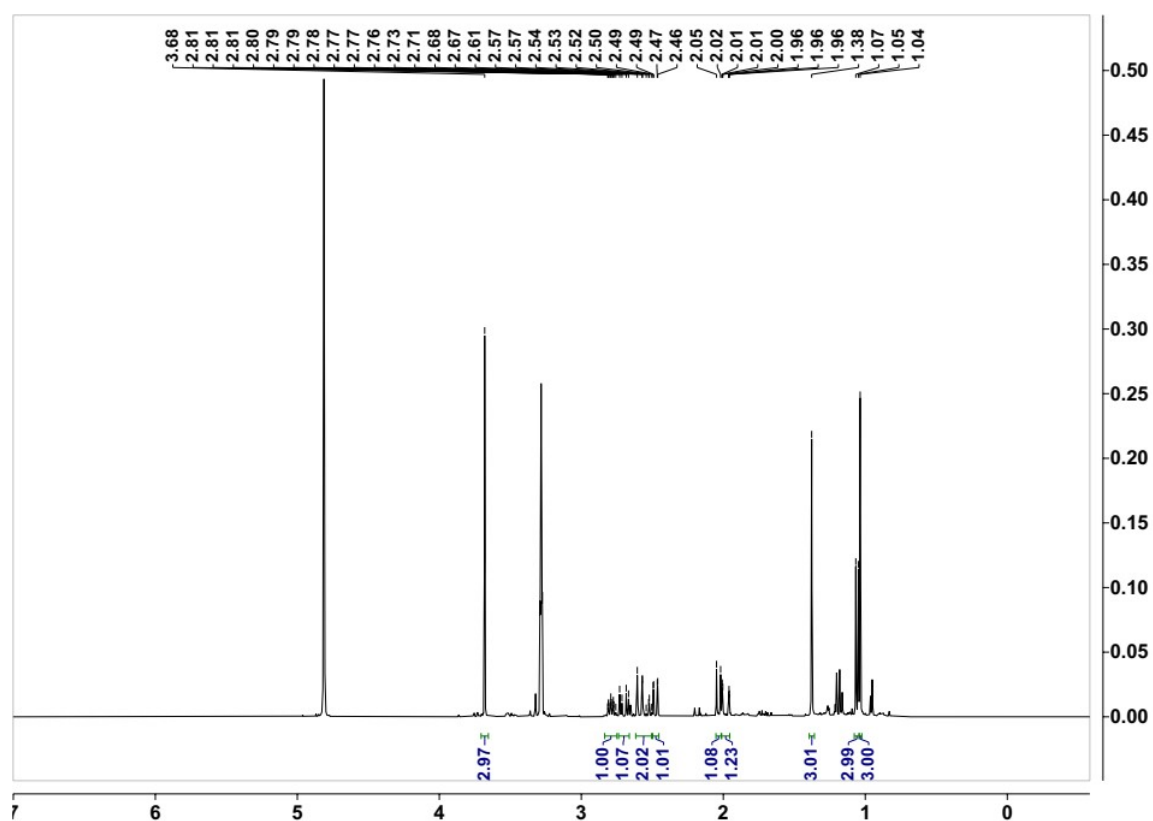

Figure S10: <sup>1</sup>H NMR spectrum of compound **2** in CD<sub>3</sub>OD (400 MHz)

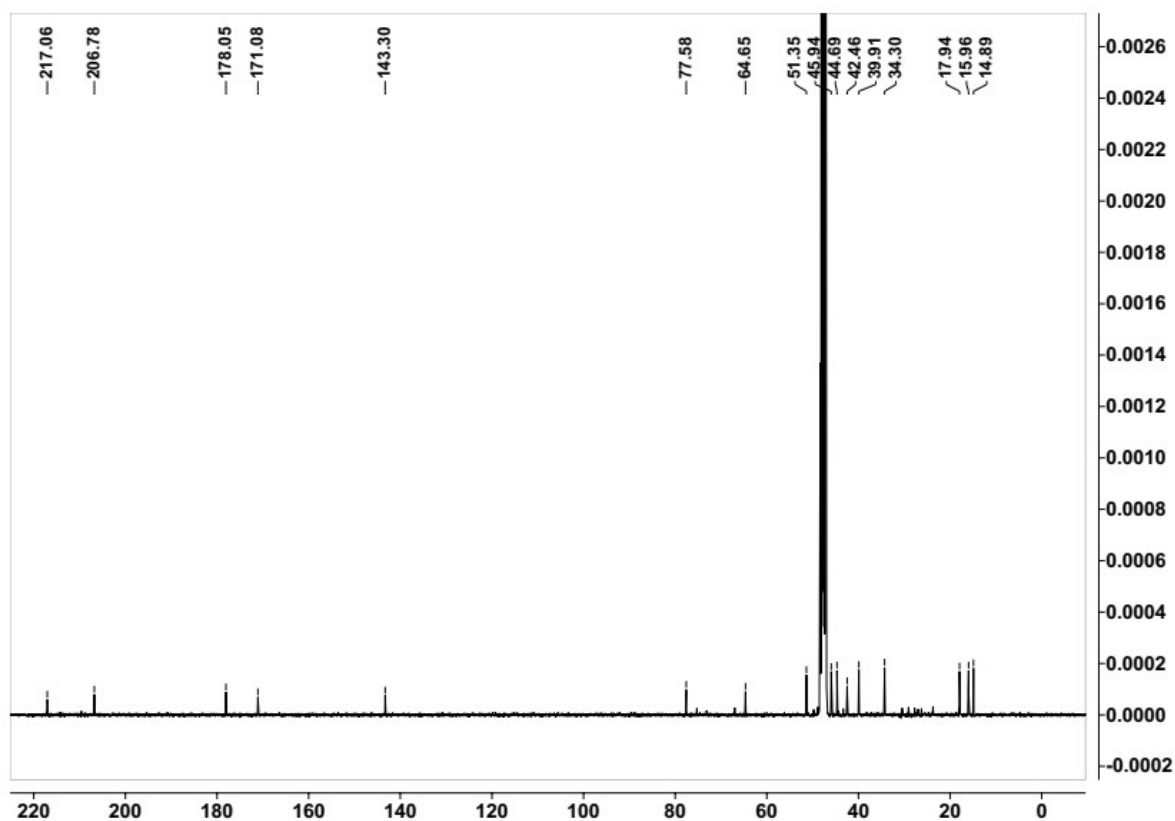

Figure S11: <sup>13</sup>C NMR spectrum of compound **2** in CD<sub>3</sub>OD (400 MHz)

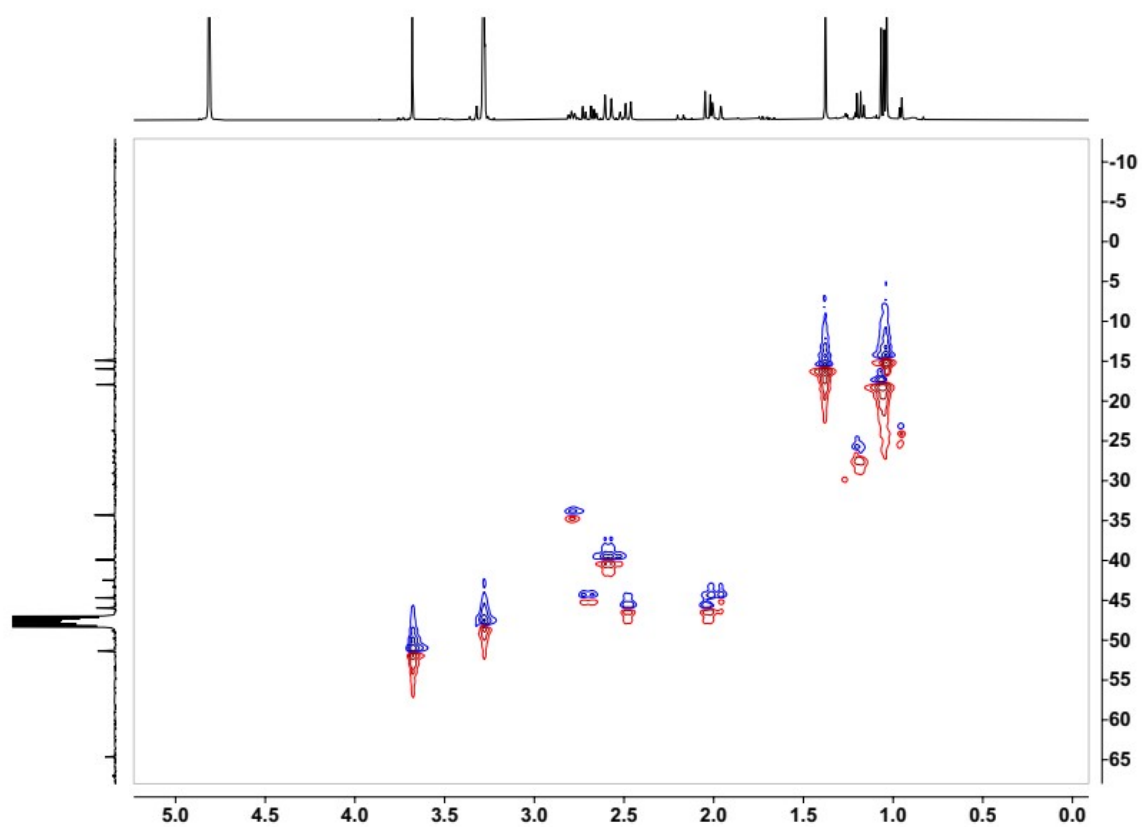

Figure S12: HSQC spectrum of compound **2** in CD<sub>3</sub>OD (400 MHz)

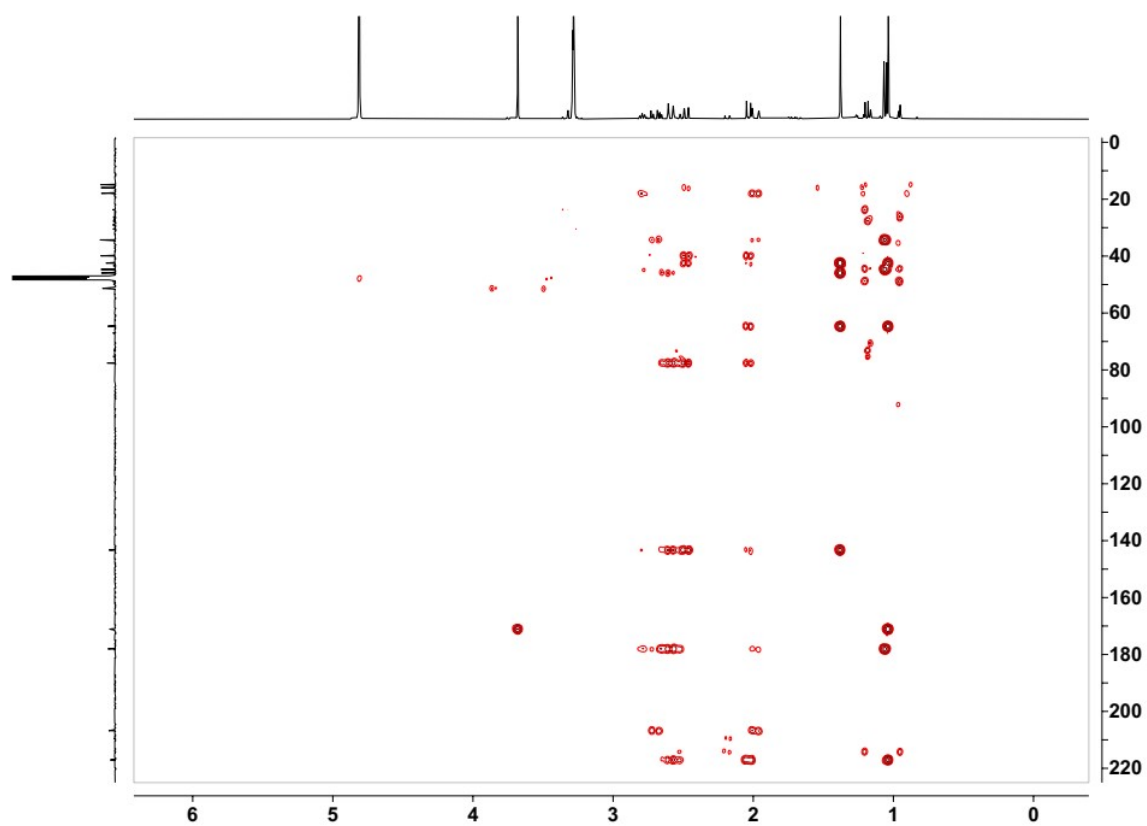

Figure S13: HMBC spectrum of compound **2** in CD<sub>3</sub>OD (400 MHz)

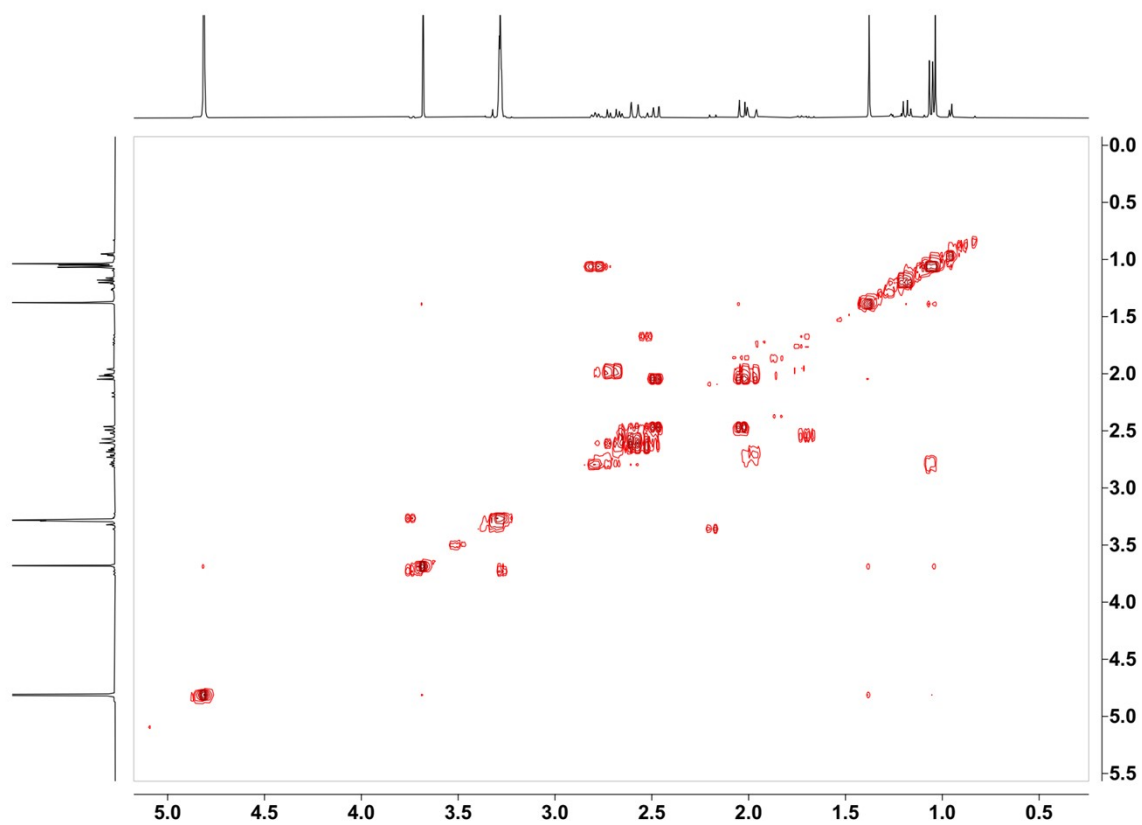

Figure S14: COSY spectrum of compound **2** in CD<sub>3</sub>OD (400 MHz)

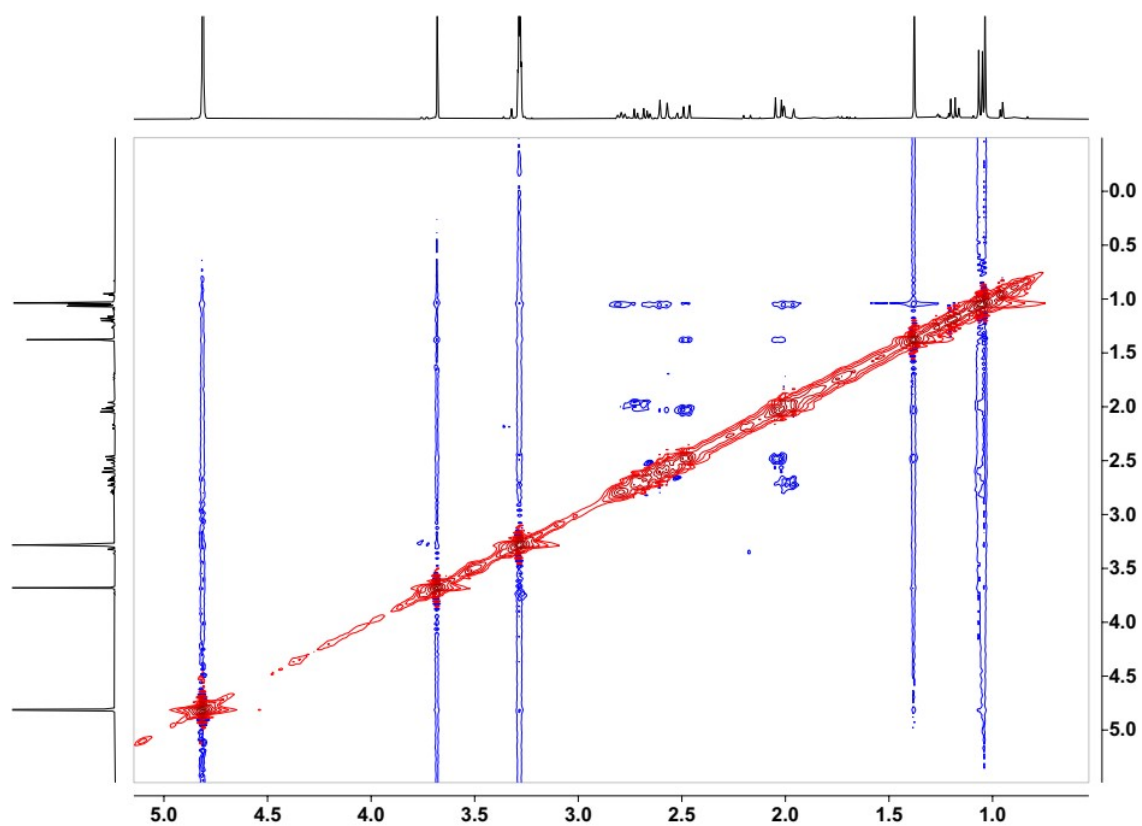

Figure S15: NOESY spectrum of compound **2** in CD<sub>3</sub>OD (400 MHz)

# Compound Table

| Compound Label  | RT    | Mass     | Abund  | Formula  | Tgt Mass | Diff (ppm) |
|-----------------|-------|----------|--------|----------|----------|------------|
| Cpd 1: C16H20O5 | 0.203 | 292.1307 | 178996 | C16H20O5 | 292.1311 | -1.17      |

| Compound Label  | RT    | Algorithm       | Mass     |
|-----------------|-------|-----------------|----------|
| Cpd 1: C16H20O5 | 0.203 | Find By Formula | 292.1307 |

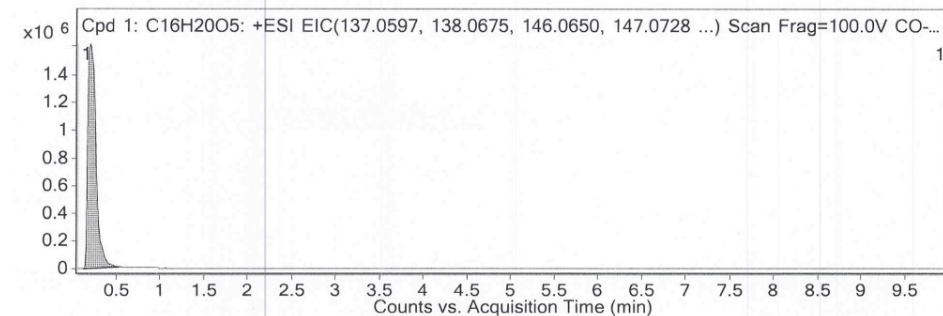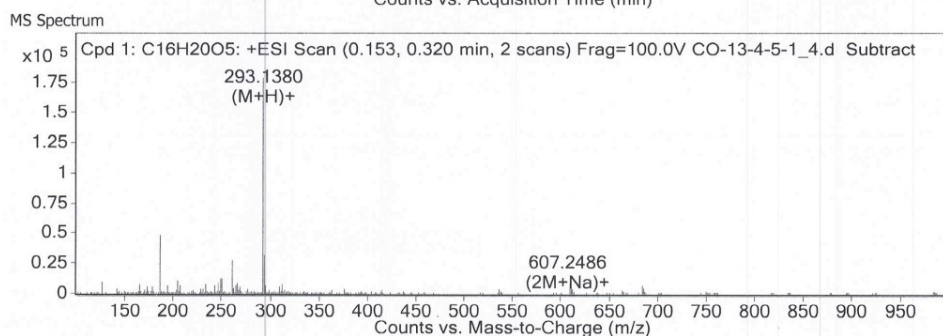

## Qualitative Compound Report

### MS Zoomed Spectrum

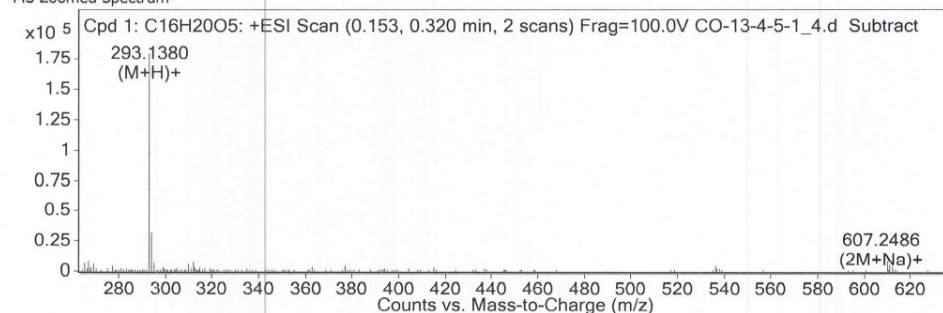

### MS Spectrum Peak List

| m/z      | Calc m/z | Diff(ppm) | z | Abund  | Formula        | Ion      |
|----------|----------|-----------|---|--------|----------------|----------|
| 293.138  | 293.1384 | -1.19     |   | 178996 | C16 H21 O5     | (M+H)+   |
| 294.1424 | 294.1418 | 2.22      |   | 31580  | C16 H21 O5     | (M+H)+   |
| 294.2901 |          |           |   | 1580   |                |          |
| 295.1482 | 295.1441 | 14.01     |   | 6587   | C16 H21 O5     | (M+H)+   |
| 310.1668 | 310.1649 | 6.26      | 1 | 5618   | C16 H24 N O5   | (M+NH4)+ |
| 311.1655 | 311.1682 | -8.71     | 1 | 1851   | C16 H24 N O5   | (M+NH4)+ |
| 312.1717 | 312.1705 | 3.61      | 1 | 2263   | C16 H24 N O5   | (M+NH4)+ |
| 315.1194 | 315.1203 | -2.98     | 1 | 2555   | C16 H20 Na O5  | (M+Na)+  |
| 331.096  | 331.0942 | 5.45      | 1 | 1084   | C16 H20 K O5   | (M+K)+   |
| 607.2486 | 607.2514 | -4.61     | 1 | 366    | C32 H40 Na O10 | (2M+Na)+ |

--- End Of Report ---

Figure S16: MS spectrum of compound 2

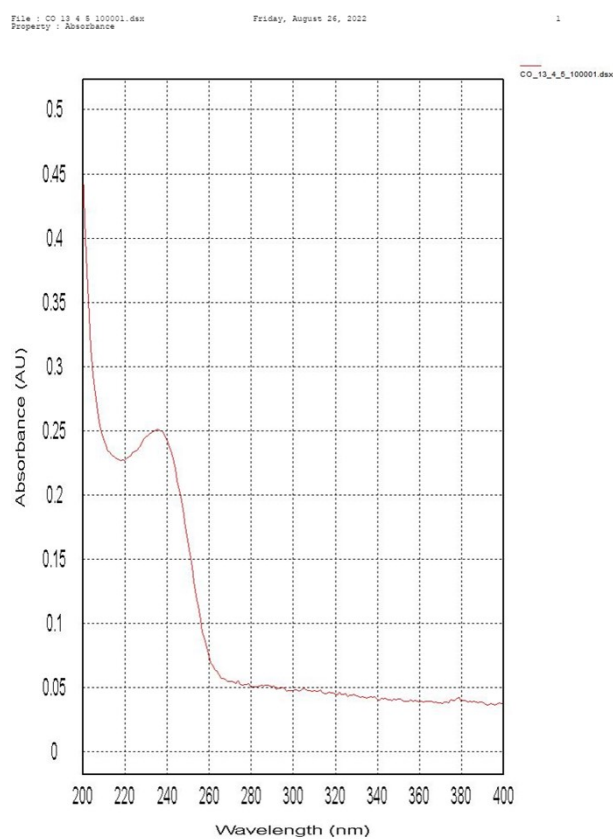

Figure S17: UV spectrum of compound **2**

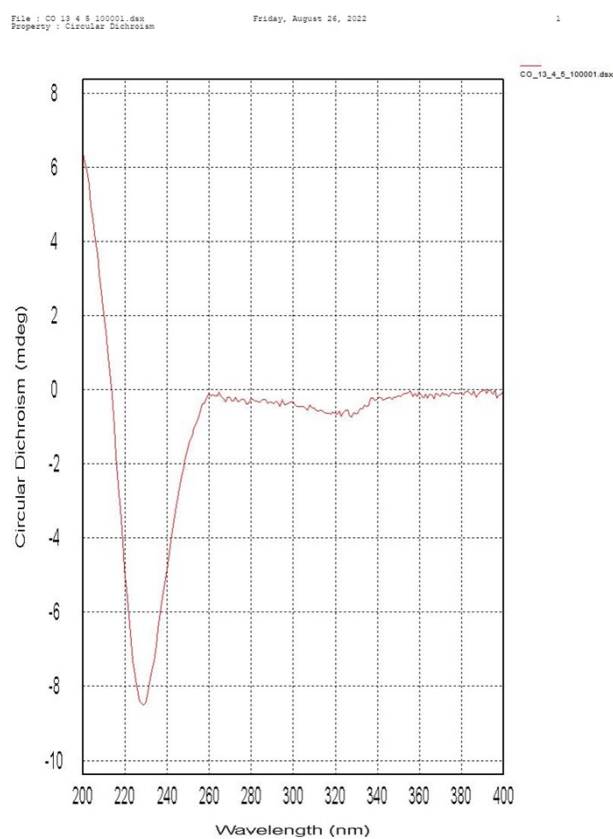

Figure S18: Experimental ECD spectrum of compound **2**

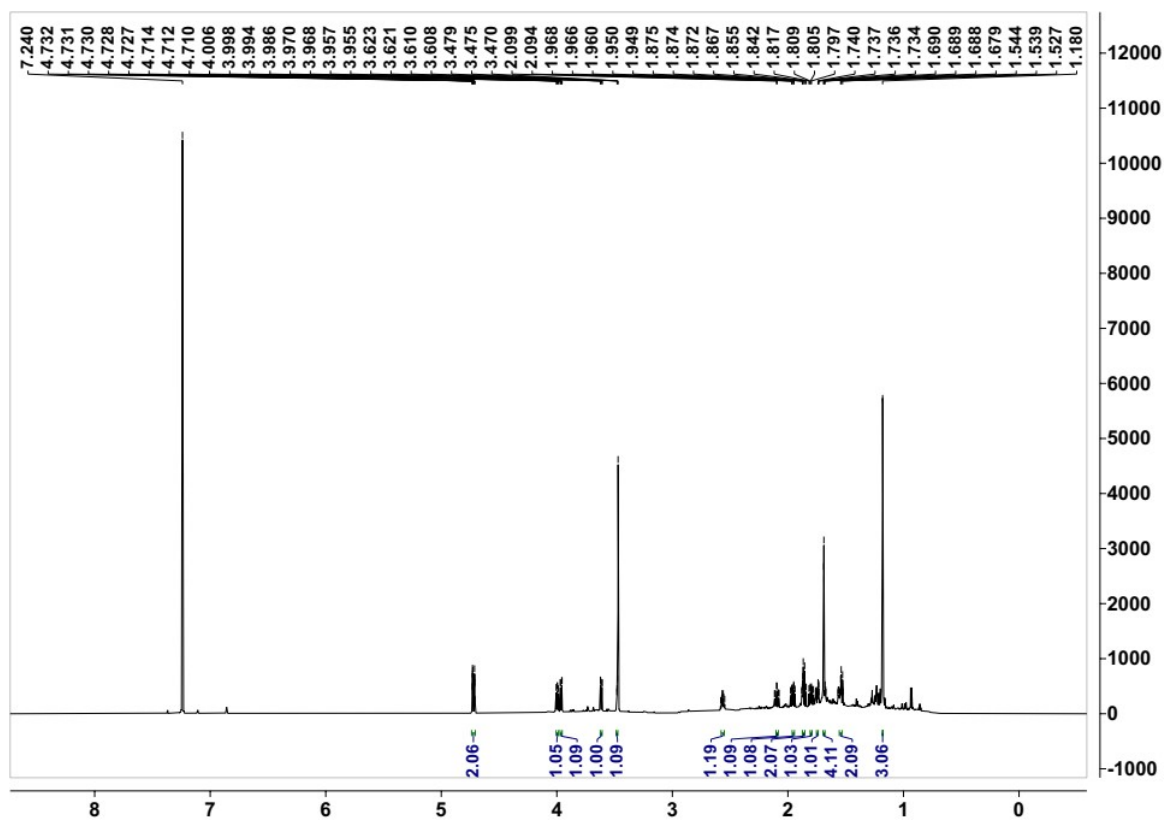

Figure S19:  $^1\text{H}$  NMR spectrum of compound **3** in  $\text{CDCl}_3$  (800 MHz)

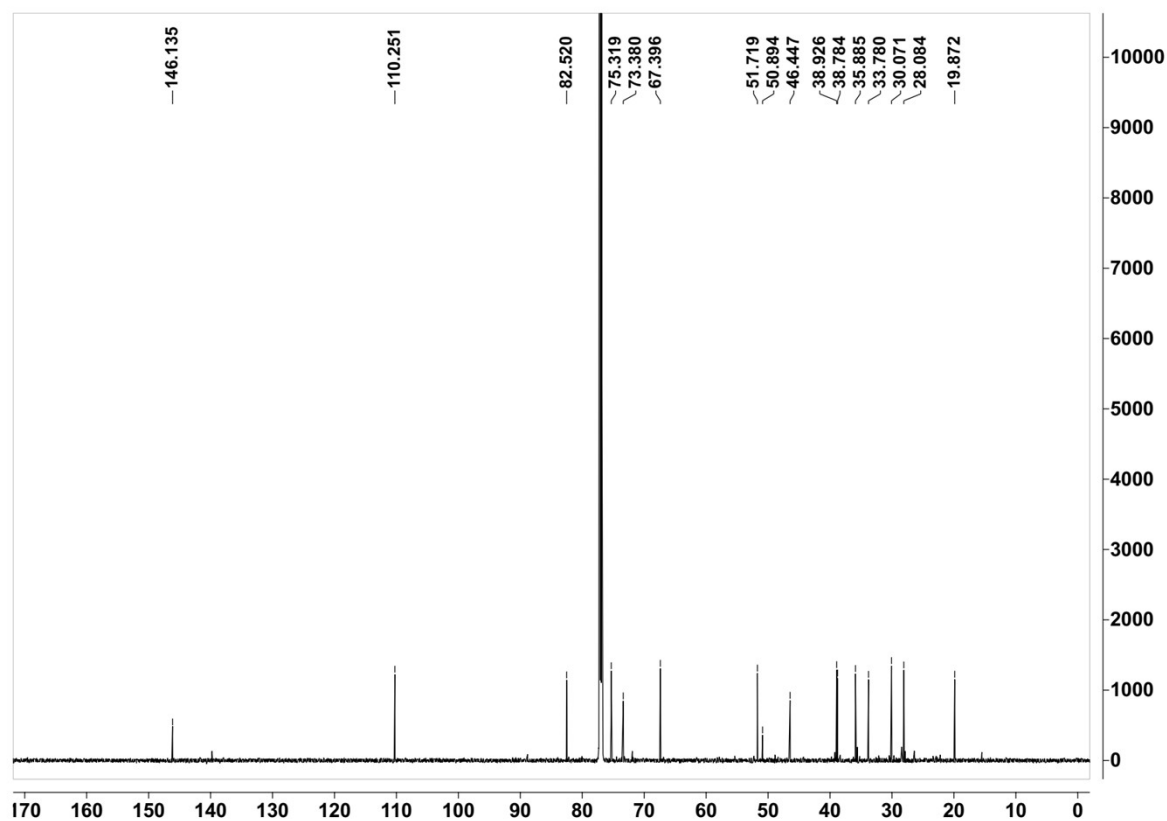

Figure S20:  $^{13}\text{C}$  NMR spectrum of compound **3** in  $\text{CDCl}_3$  (800 MHz)

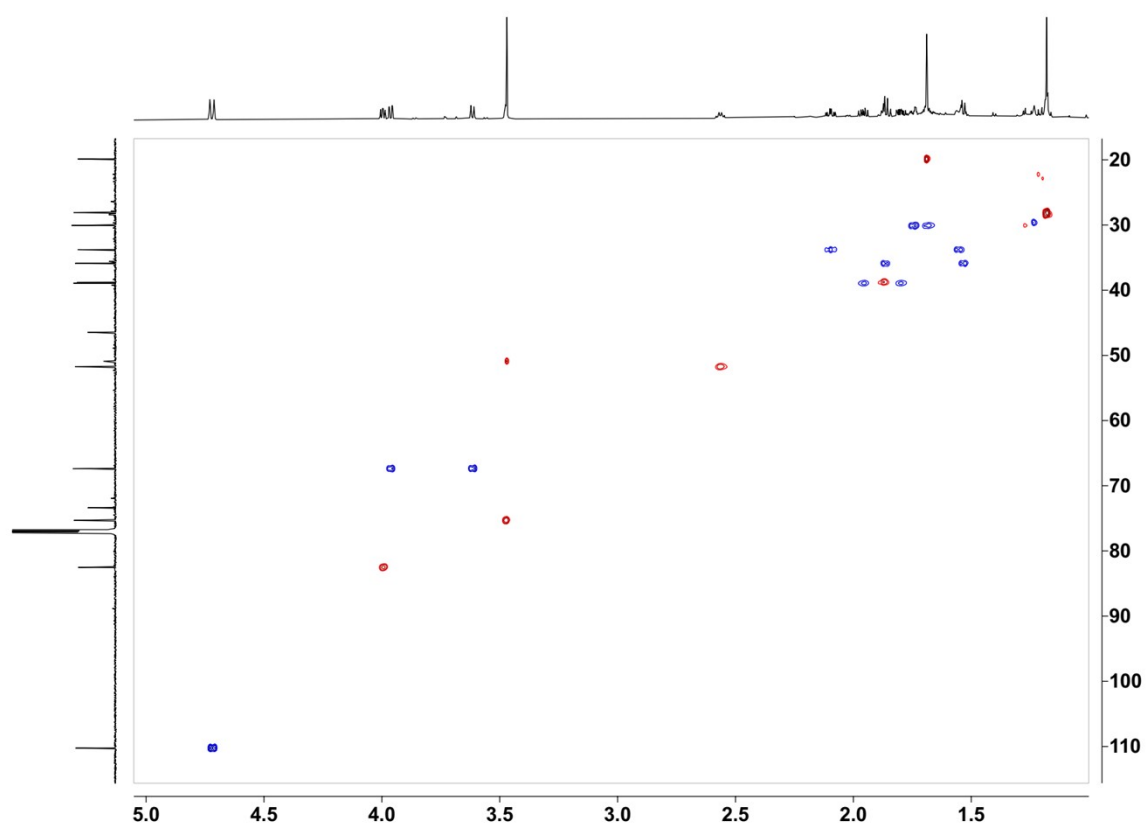

Figure S21: HSQC spectrum of compound **3** in CDCl<sub>3</sub> (800 MHz)

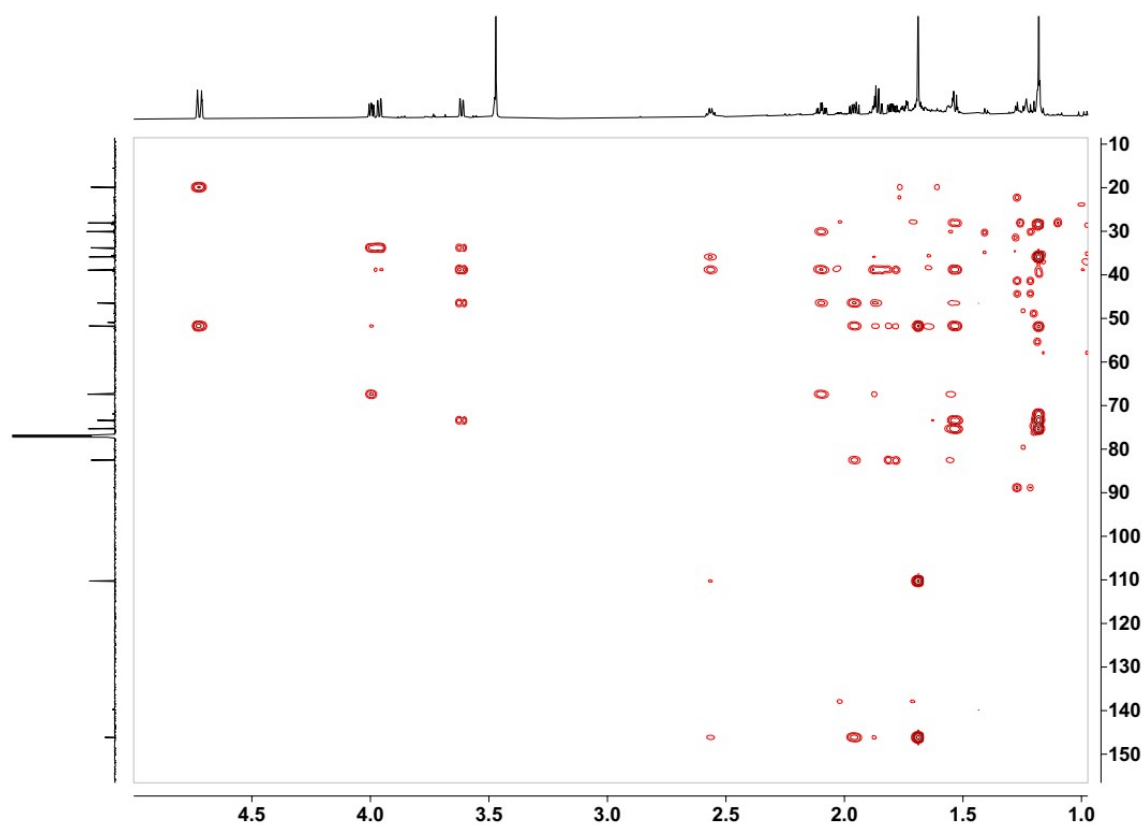

Figure S22: HMBC spectrum of compound **3** in CDCl<sub>3</sub> (800 MHz)

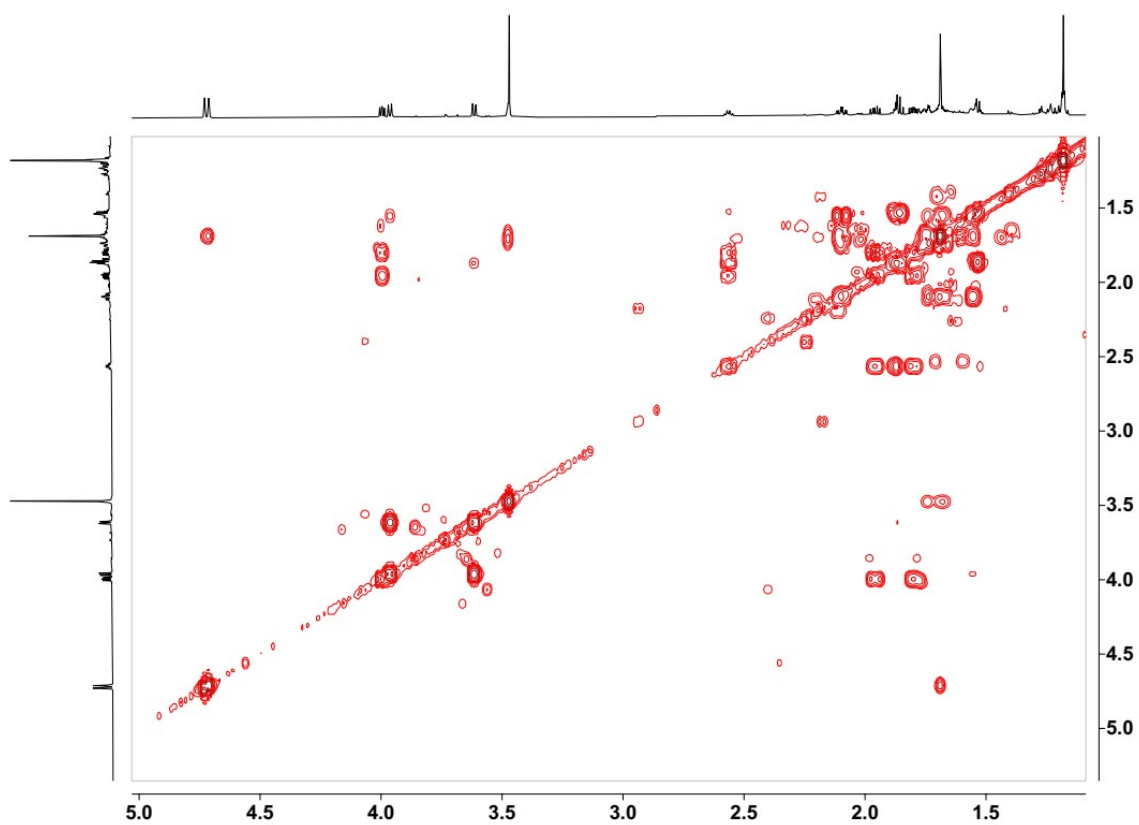

Figure S23: COSY spectrum of compound **3** in CDCl<sub>3</sub> (800 MHz)

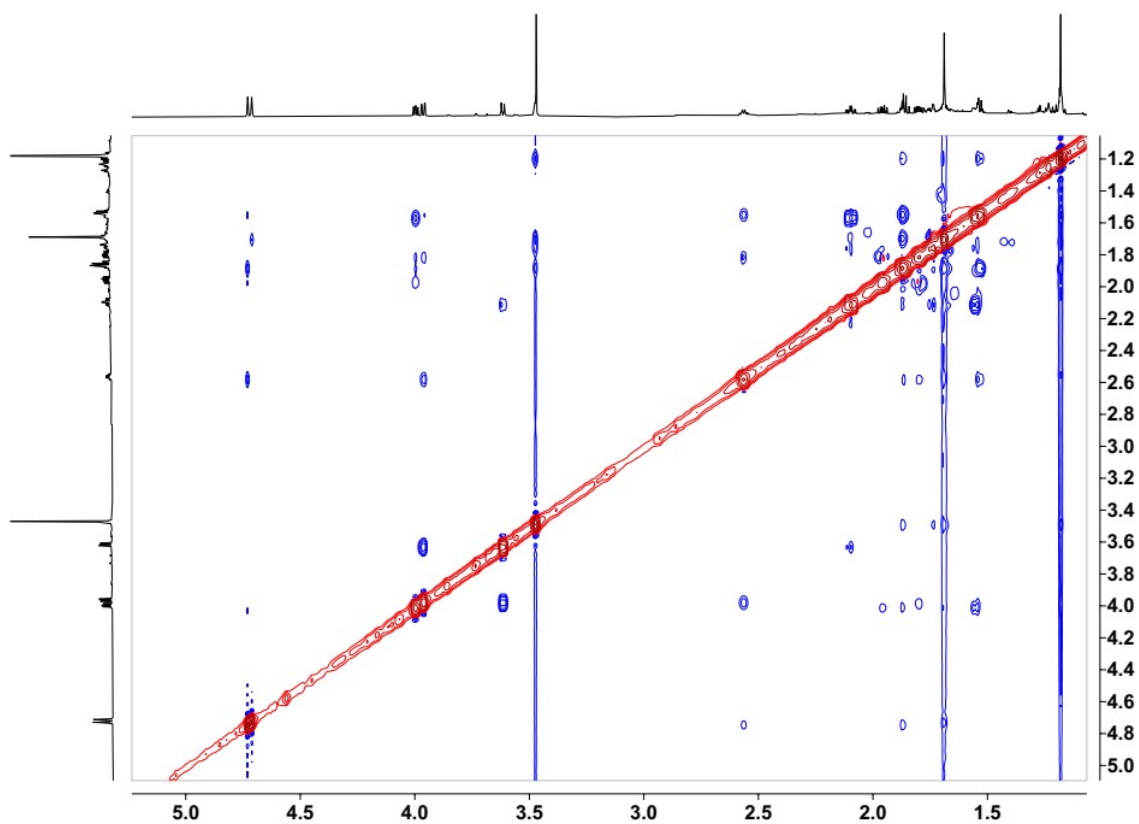

Figure S24: NOESY spectrum of compound **3** in CDCl<sub>3</sub> (800 MHz)

### Compound Table

| Compound Label  | RT    | Mass     | Abund | Formula  | Tgt Mass | Diff (ppm) |
|-----------------|-------|----------|-------|----------|----------|------------|
| Cpd 1: C15H24O3 | 0.208 | 252.1715 | 69994 | C15H24O3 | 252.1725 | -4.19      |

| Compound Label  | RT    | Algorithm       | Mass     |
|-----------------|-------|-----------------|----------|
| Cpd 1: C15H24O3 | 0.208 | Find By Formula | 252.1715 |

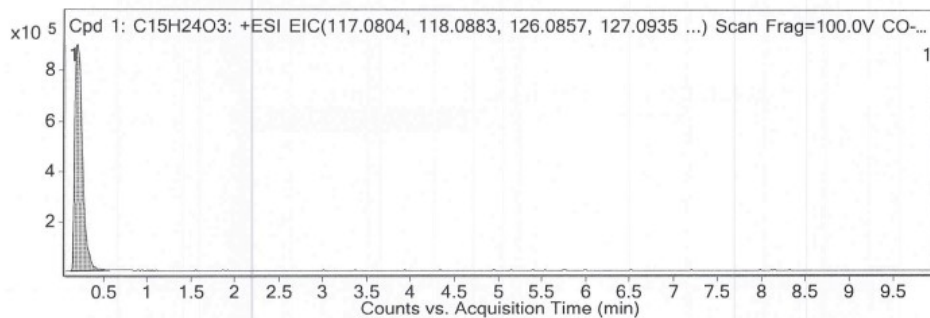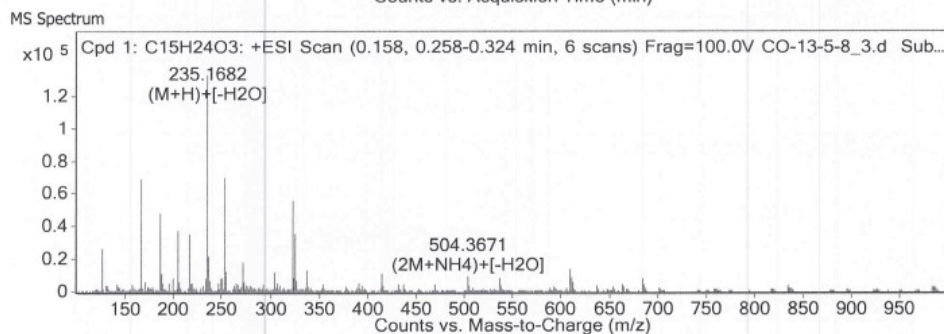

## Qualitative Compound Report

### MS Zoomed Spectrum

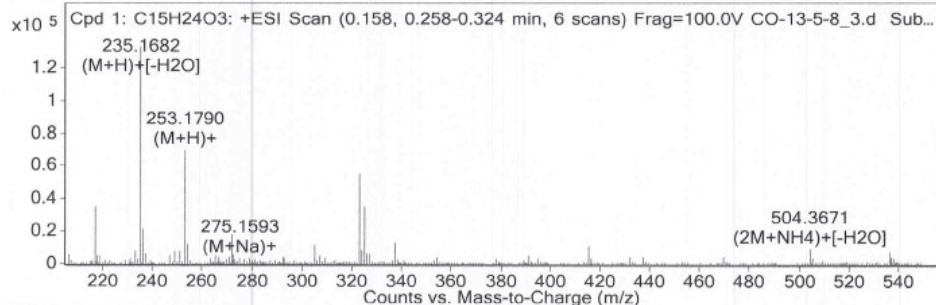

### MS Spectrum Peak List

| m/z      | Calc m/z | Diff(ppm) | z | Abund  | Formula       | Ion             |
|----------|----------|-----------|---|--------|---------------|-----------------|
| 235.1682 | 235.1693 | -4.63     |   | 132643 | C15 H23 O2    | (M+H)+[-H2O]    |
| 236.1721 | 236.1727 | -2.18     |   | 21277  | C15 H23 O2    | (M+H)+[-H2O]    |
| 253.179  | 253.1798 | -3.33     | 1 | 69994  | C15 H25 O3    | (M+H)+          |
| 254.1825 | 254.1832 | -2.86     | 1 | 11933  | C15 H25 O3    | (M+H)+          |
| 270.2037 | 270.2064 | -9.85     | 1 | 2785   | C15 H28 N O3  | (M+NH4)+        |
| 275.1593 | 275.1618 | -8.98     | 1 | 3833   | C15 H24 Na O3 | (M+Na)+         |
| 487.34   | 487.3418 | -3.77     | 1 | 643    | C30 H47 O5    | (2M+H)+[-H2O]   |
| 504.3671 | 504.3684 | -2.5      | 1 | 9511   | C30 H50 N O5  | (2M+NH4)+[-H2O] |
| 509.32   | 509.3237 | -7.32     | 1 | 2150   | C30 H46 Na O5 | (2M+Na)+[-H2O]  |
| 525.2942 | 525.2977 | -6.58     | 1 | 546    | C30 H46 K O5  | (2M+K)+[-H2O]   |

--- End Of Report ---

Figure S25: MS spectrum of compound 3

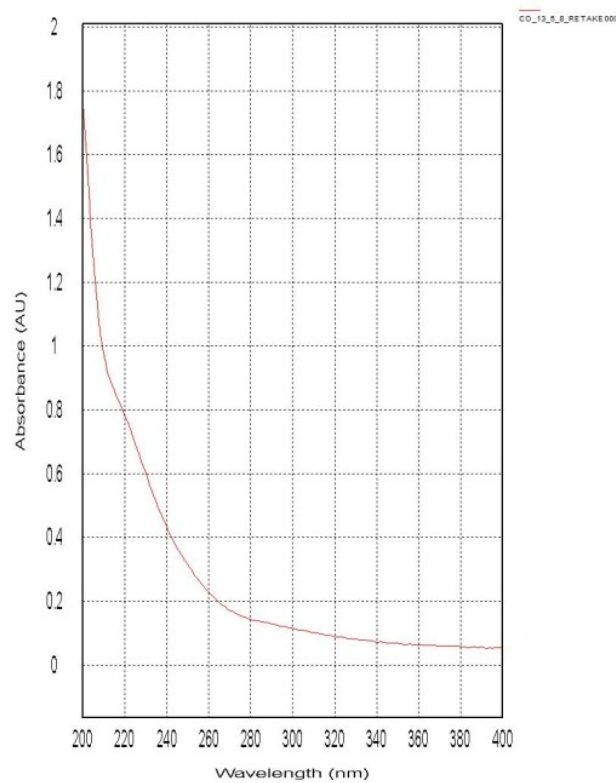

Figure S26: UV spectrum of compound **3**

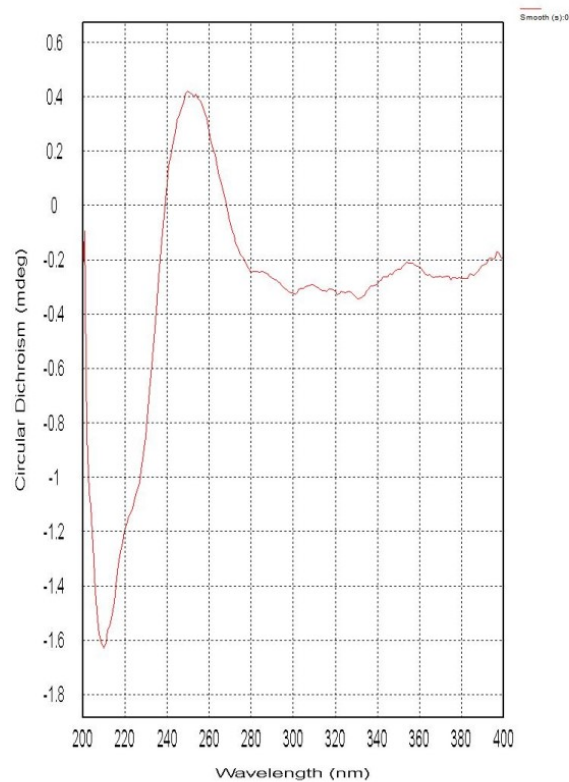

Figure S27: Experimental ECD spectrum of compound **3**

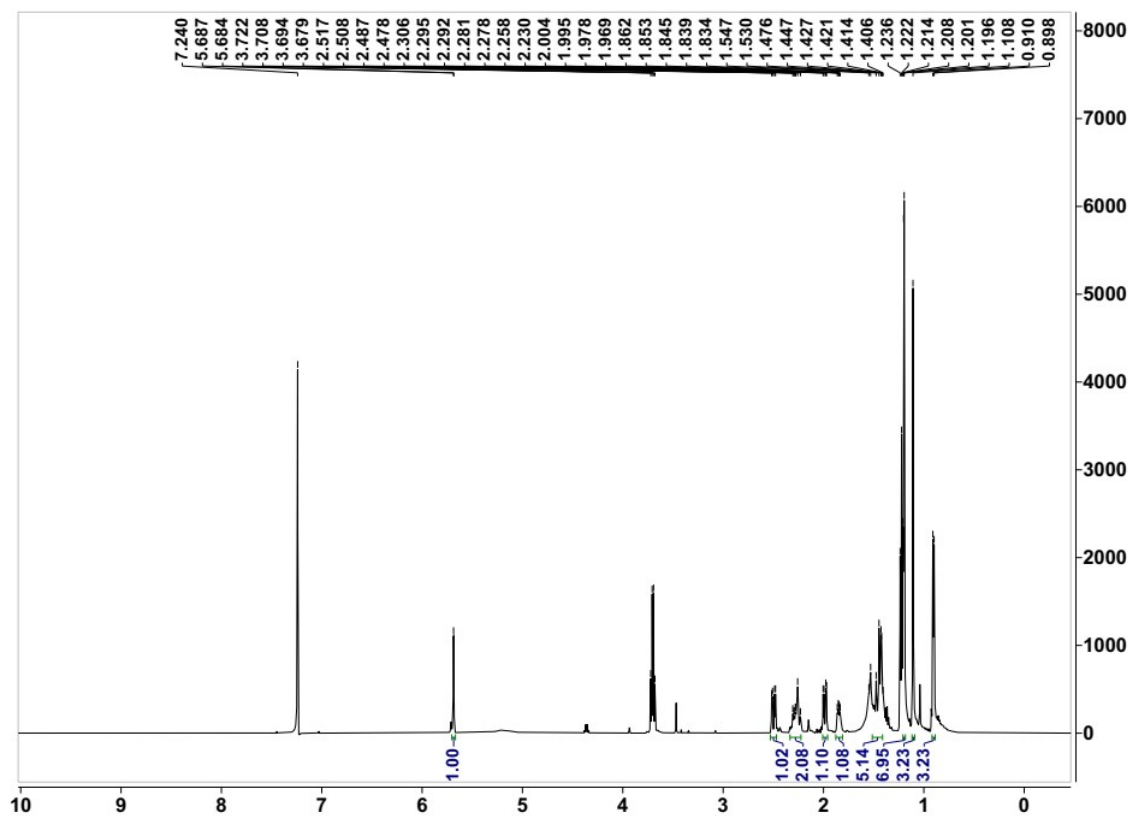

Figure S28:  $^1\text{H}$  NMR spectrum of compound **4** in  $\text{CDCl}_3$  (500 MHz)

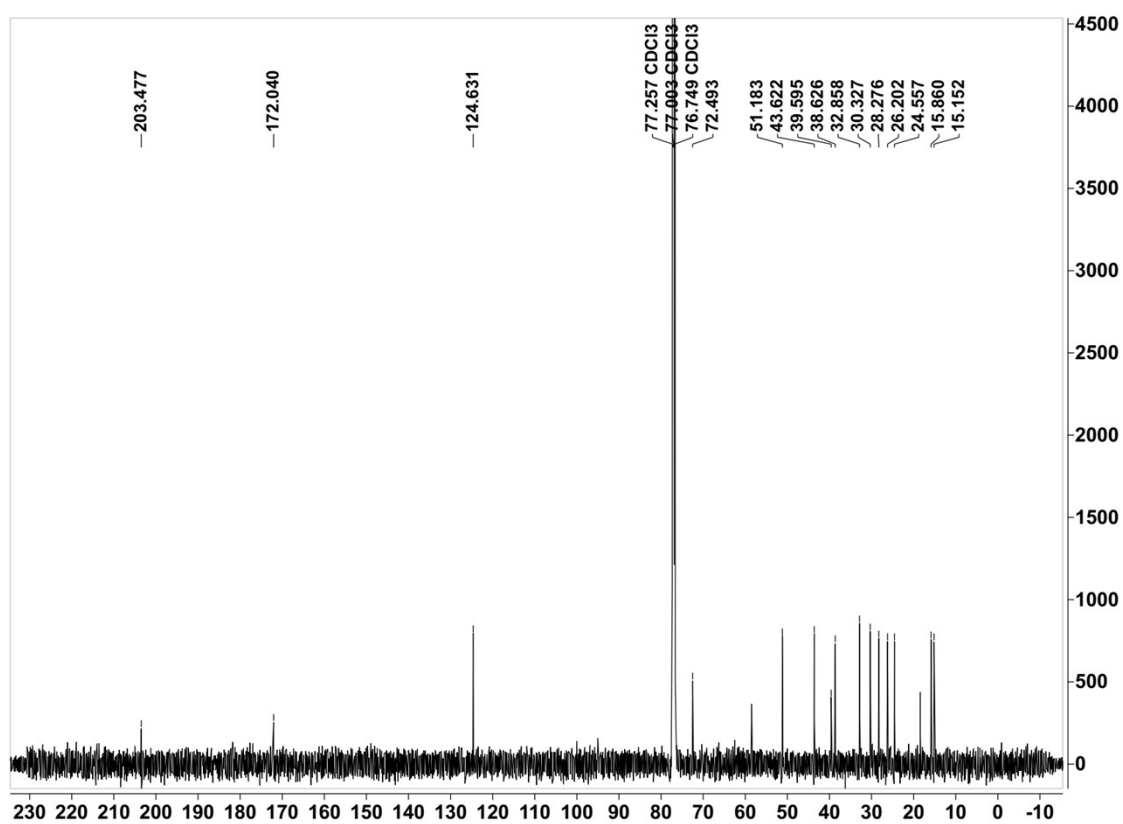

Figure S29:  $^{13}\text{C}$  NMR spectrum of compound **4** in  $\text{CDCl}_3$  (500 MHz)

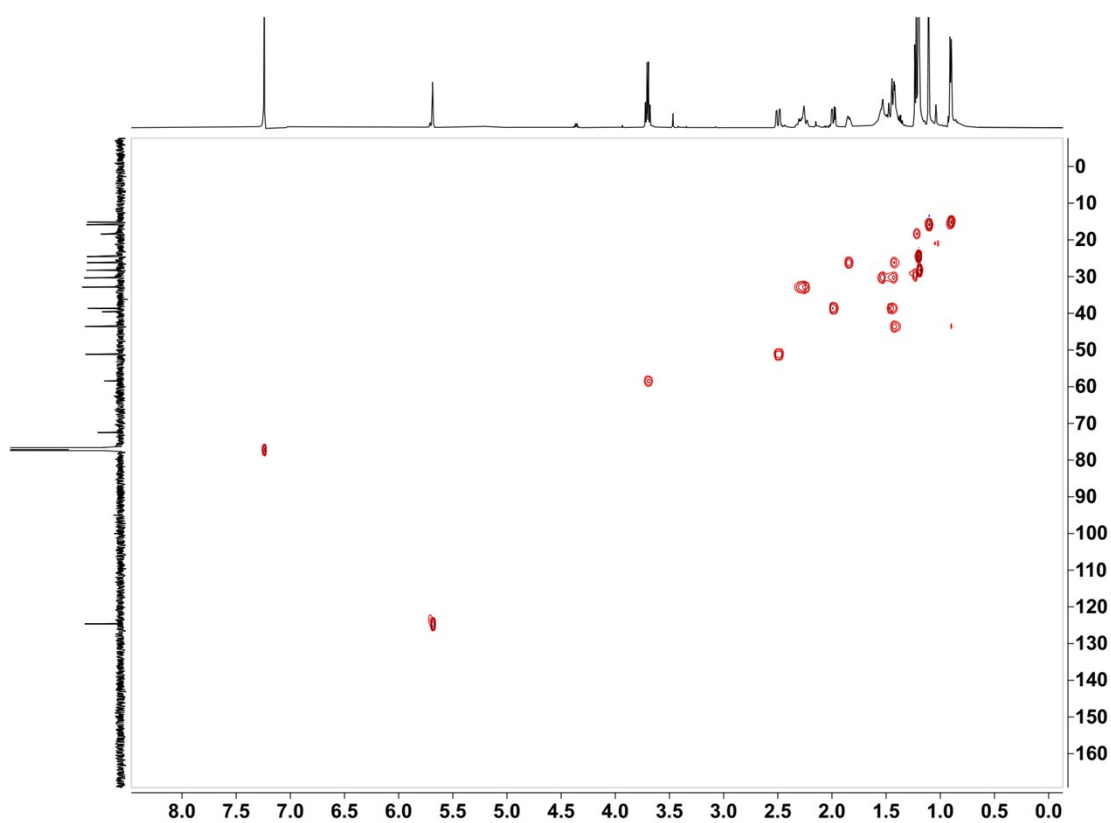

Figure S30: HSQC spectrum of compound **4** in  $\text{CDCl}_3$  (500 MHz)

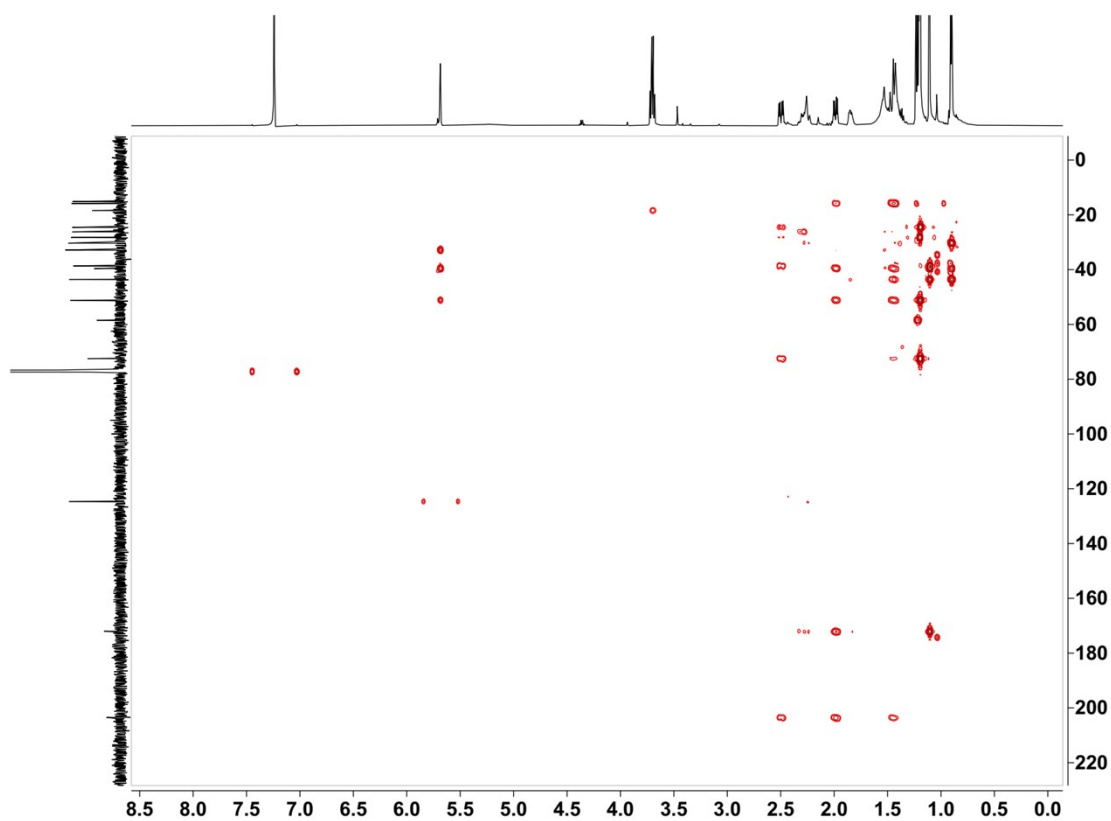

Figure S31: HMBC spectrum of compound **4** in  $\text{CDCl}_3$  (500 MHz)

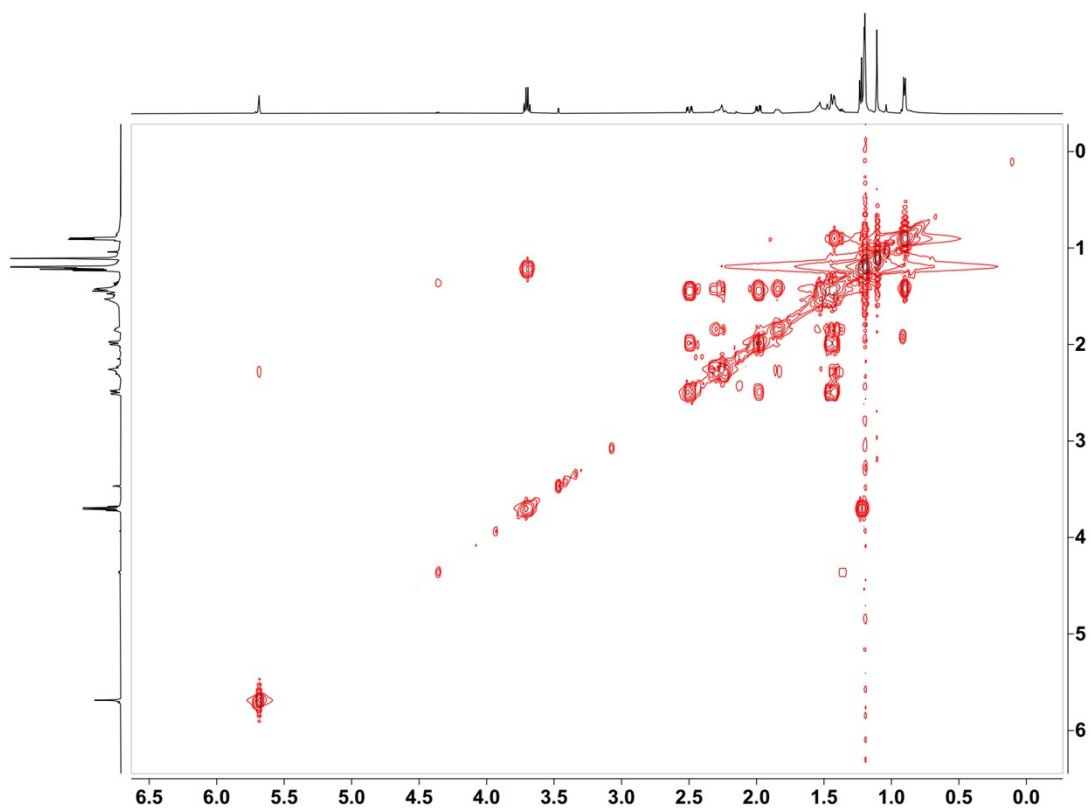

Figure S32: COSY spectrum of compound **4** in CDCl<sub>3</sub> (500 MHz)

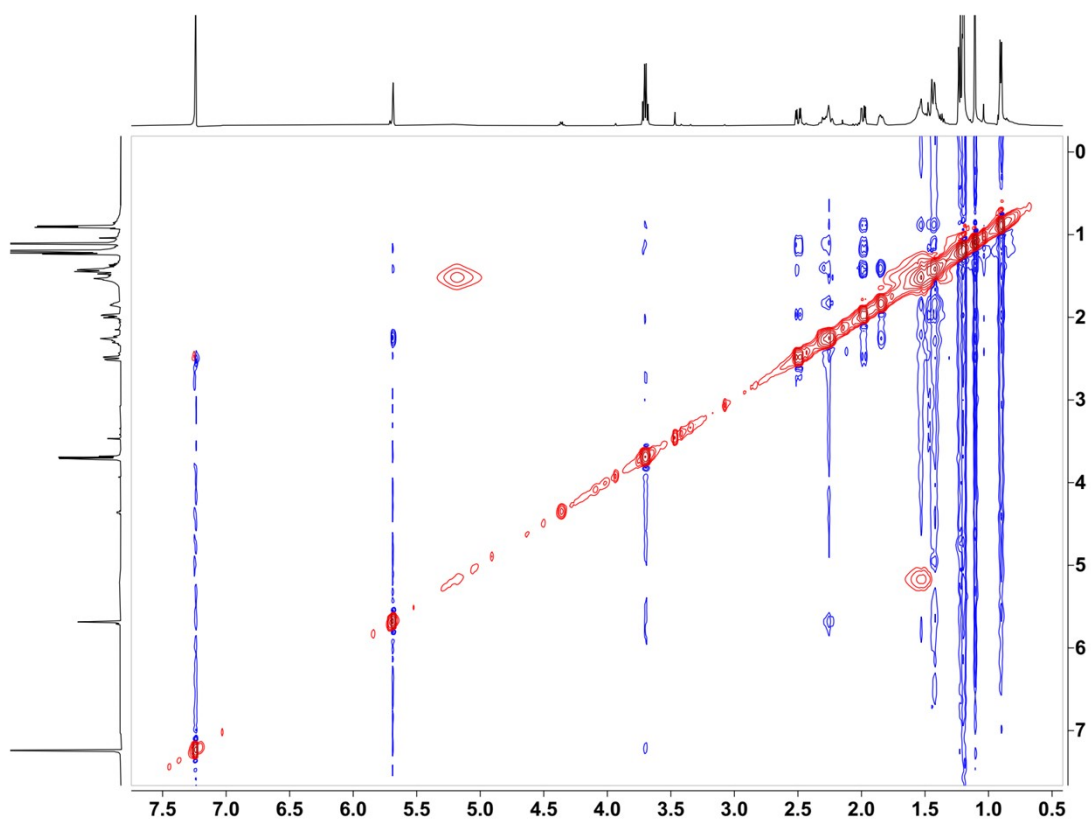

Figure S33: NOESY spectrum of compound **4** in CDCl<sub>3</sub> (500 MHz)

# Compound Table

| Compound Label  | RT    | Mass     | Abund | Formula  | Tgt Mass | Diff (ppm) |
|-----------------|-------|----------|-------|----------|----------|------------|
| Cpd 1: C15H24O2 | 0.187 | 236.1777 | 88199 | C15H24O2 | 236.1776 | 0.38       |

| Compound Label  | RT    | Algorithm       | Mass     |
|-----------------|-------|-----------------|----------|
| Cpd 1: C15H24O2 | 0.187 | Find By Formula | 236.1777 |

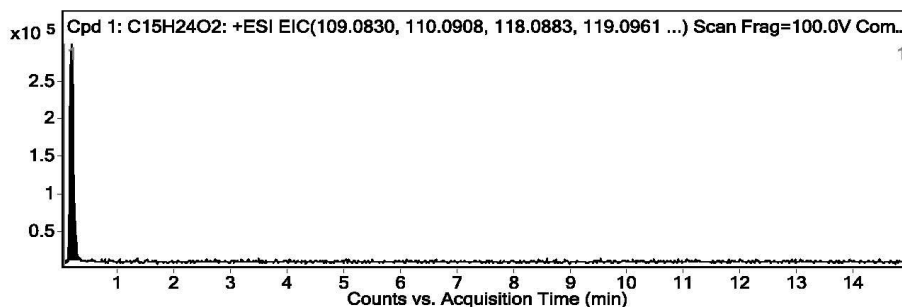

## MS Spectrum

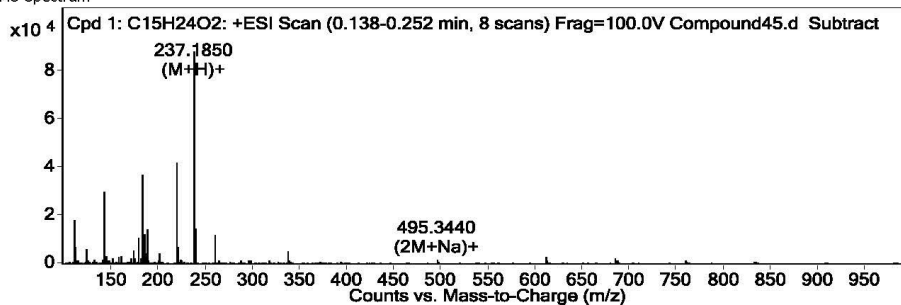

## Qualitative Compound Report

### MS Zoomed Spectrum

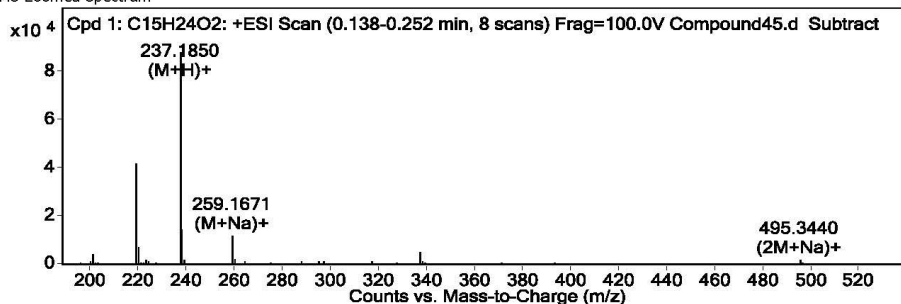

### MS Spectrum Peak List

| m/z      | Calc m/z | Diff(ppm) | z | Abund | Formula       | Ion             |
|----------|----------|-----------|---|-------|---------------|-----------------|
| 219.1744 | 219.1743 | 0.07      | 1 | 42232 | C15 H23 O     | (M+H)+[-H2O]    |
| 220.1776 | 220.1777 | -0.6      | 1 | 7100  | C15 H23 O     | (M+H)+[-H2O]    |
| 236.1775 | 236.1771 | 1.84      |   | 87    | C15 H24 O2    | M*+             |
| 237.185  | 237.1849 | 0.4       |   | 88199 | C15 H25 O2    | (M+H)+          |
| 238.1889 | 238.1883 | 2.36      |   | 14826 | C15 H25 O2    | (M+H)+          |
| 259.1671 | 259.1669 | 1.02      | 1 | 11999 | C15 H24 Na O2 | (M+Na)+         |
| 275.1412 | 275.1408 | 1.51      | 1 | 934   | C15 H24 K O2  | (M+K)+          |
| 472.3757 | 472.3785 | -5.93     | 1 | 98    | C30 H50 N O3  | (2M+NH4)+[-H2O] |
| 495.344  | 495.3445 | -0.89     | 1 | 1806  | C30 H48 Na O4 | (2M+Na)+        |
| 511.3188 | 511.3184 | 0.68      | 1 | 56    | C30 H48 K O4  | (2M+K)+         |

--- End Of Report ---

Figure S34: MS spectrum of compound 4

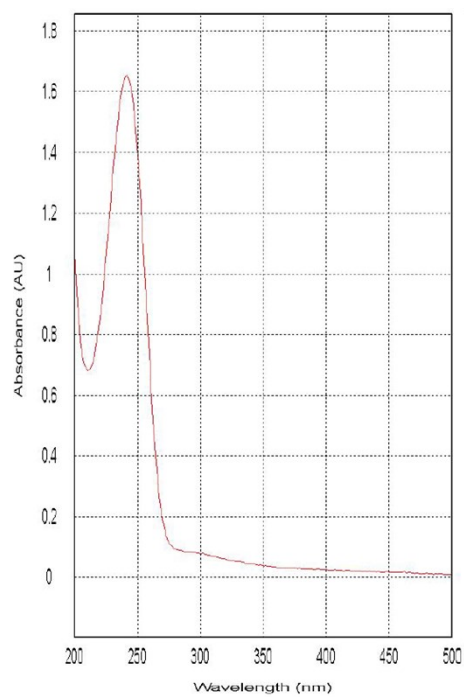

Figure S35: UV spectrum of compound 4

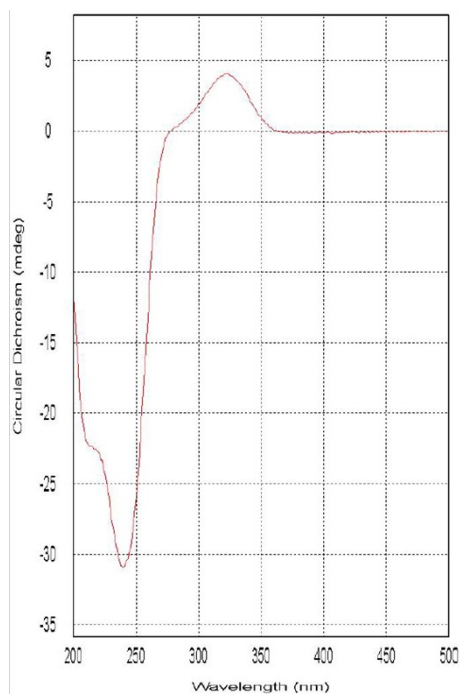

Figure S36: Experimental ECD spectrum of compound 4

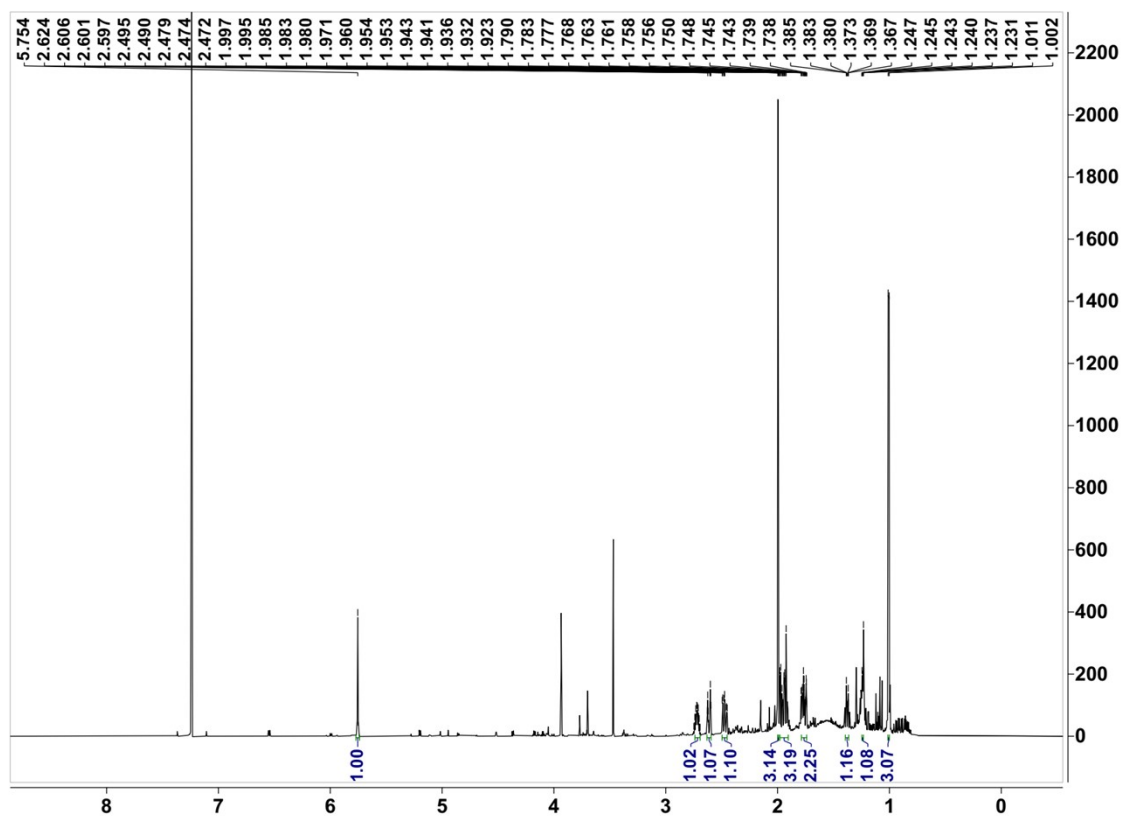

Figure S37:  $^1\text{H}$  NMR spectrum of compound **5** in  $\text{CDCl}_3$  (800 MHz)

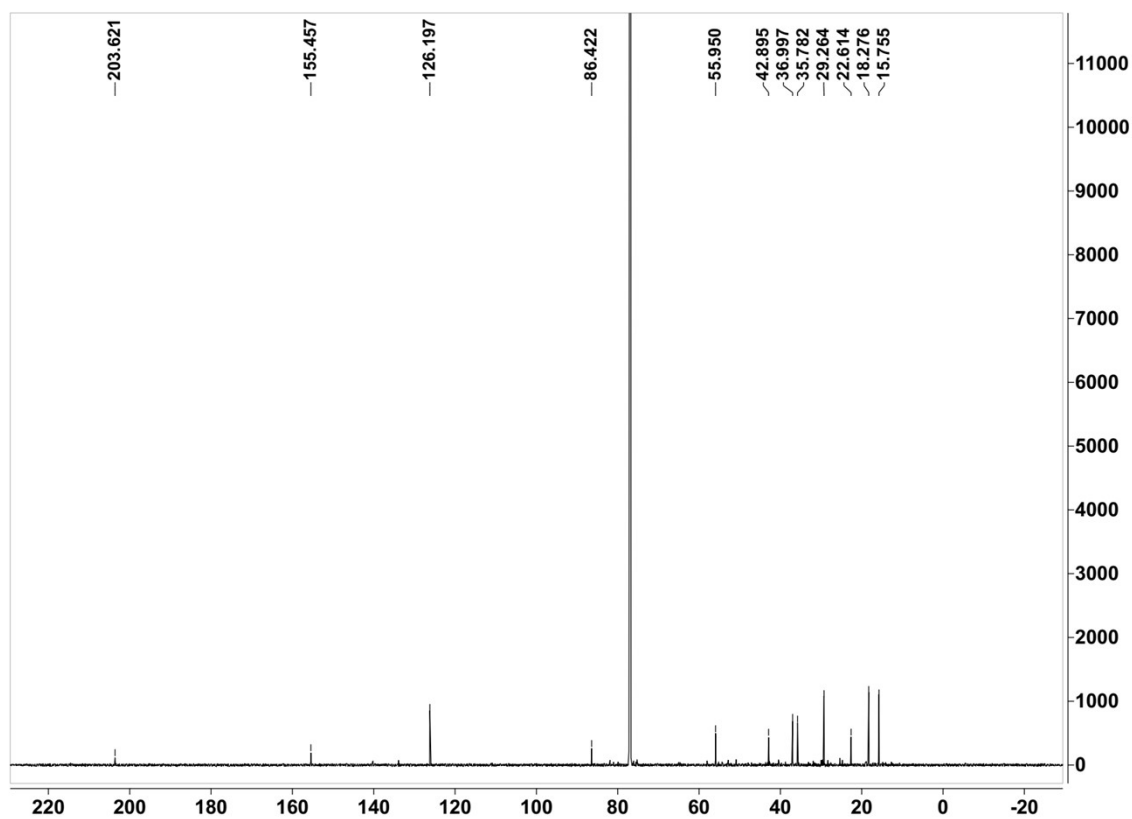

Figure S38:  $^{13}\text{C}$  NMR spectrum of compound **5** in  $\text{CDCl}_3$  (800 MHz)

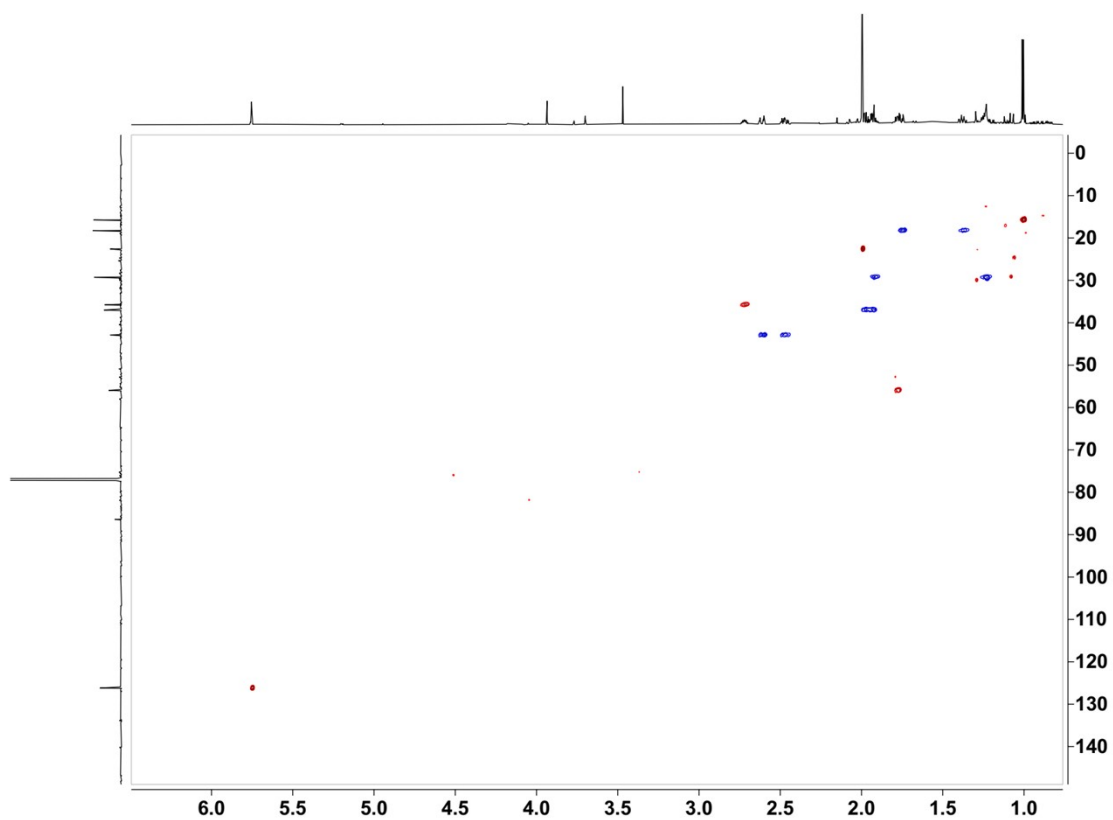

Figure S39: HSQC spectrum of compound **5** in  $\text{CDCl}_3$  (800 MHz)

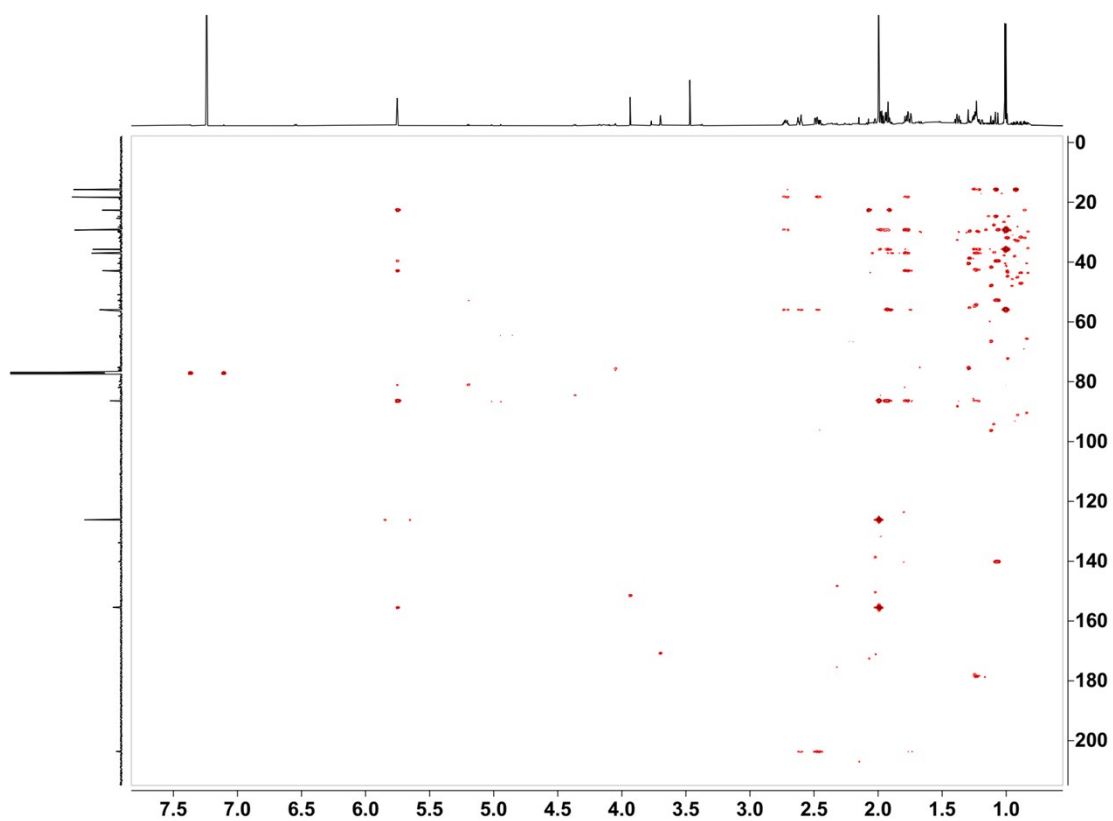

Figure S40: HMBC spectrum of compound **5** in  $\text{CDCl}_3$  (800 MHz)

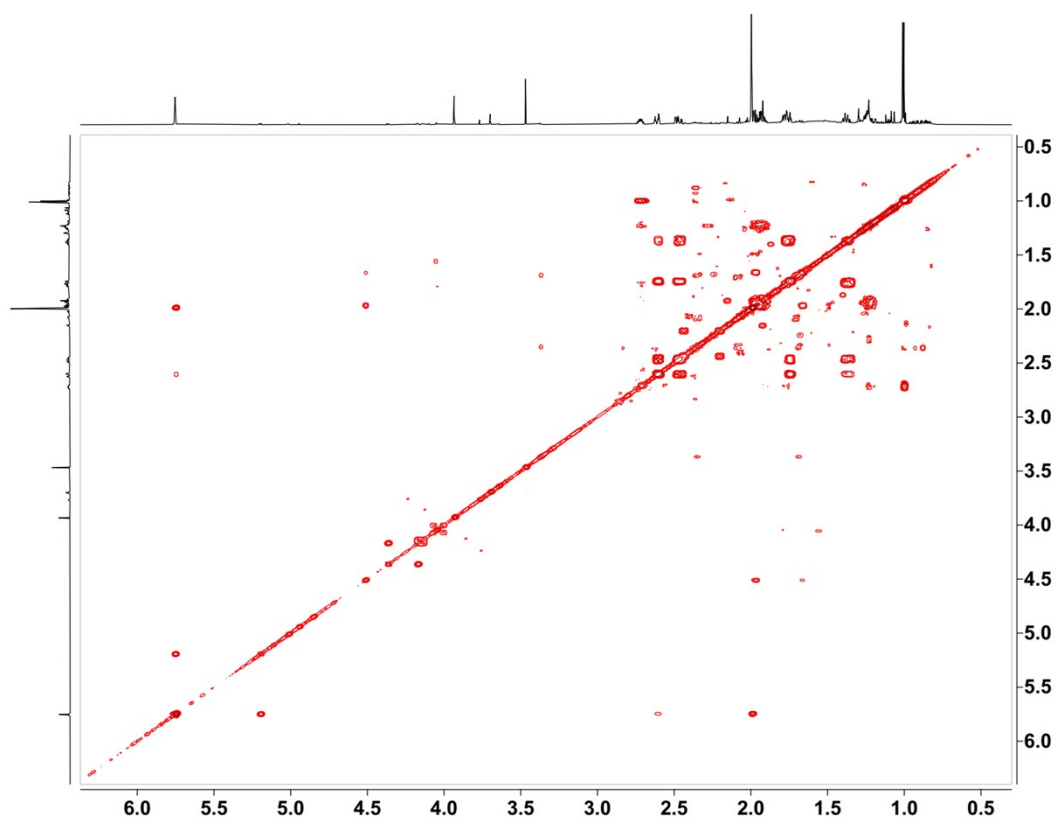

Figure S41: COSY spectrum of compound **5** in CDCl<sub>3</sub> (800 MHz)

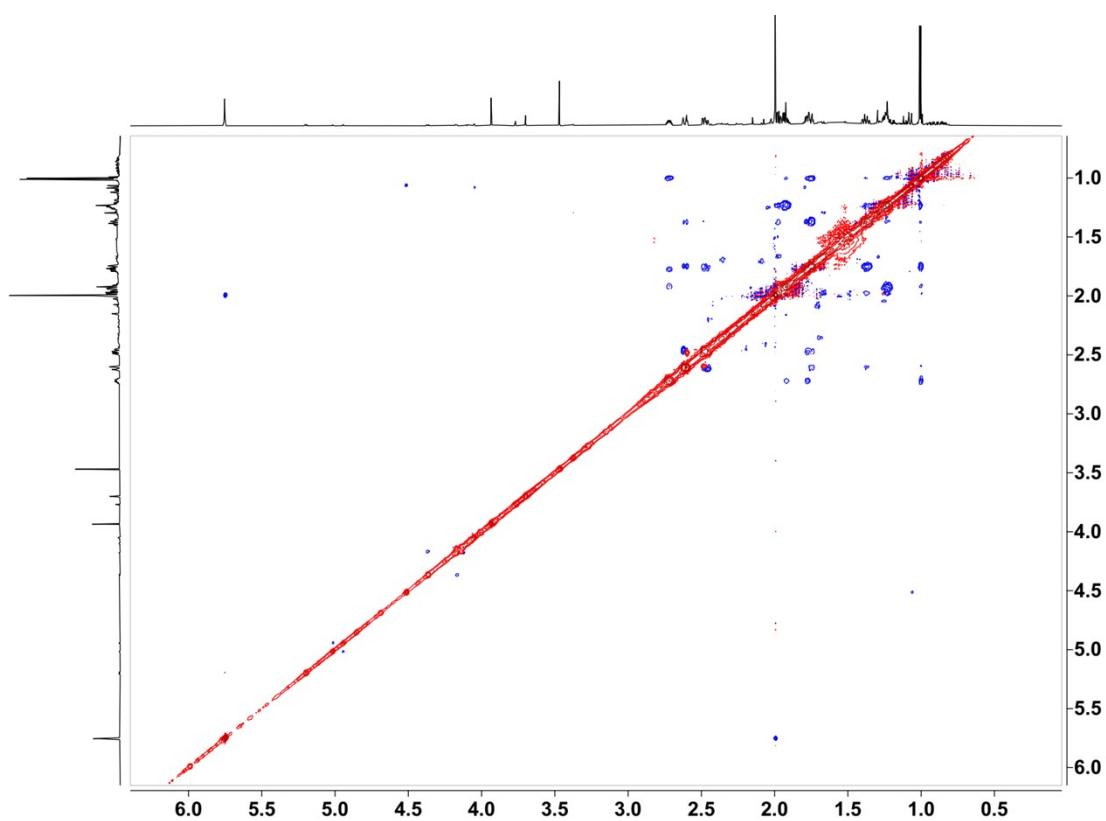

Figure S42: NOESY spectrum of compound **5** in CDCl<sub>3</sub> (800 MHz)

# Compound Table

| Compound Label  | RT    | Mass     | Abund | Formula  | Tgt Mass | Diff (ppm) |
|-----------------|-------|----------|-------|----------|----------|------------|
| Cpd 1: C12H18O2 | 0.172 | 194.1309 | 75519 | C12H18O2 | 194.1307 | 1.08       |

| Compound Label  | RT    | Algorithm       | Mass     |
|-----------------|-------|-----------------|----------|
| Cpd 1: C12H18O2 | 0.172 | Find By Formula | 194.1309 |

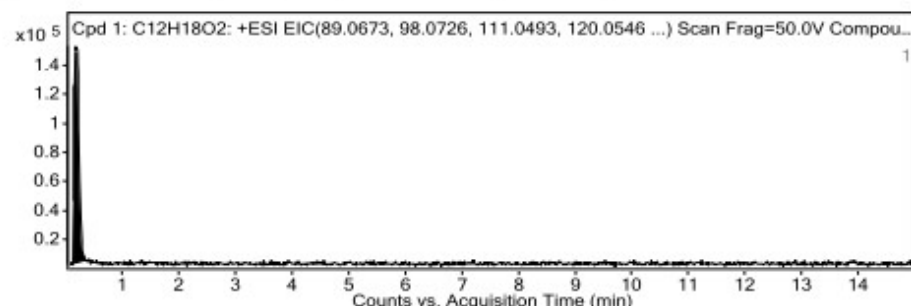

## MS Spectrum

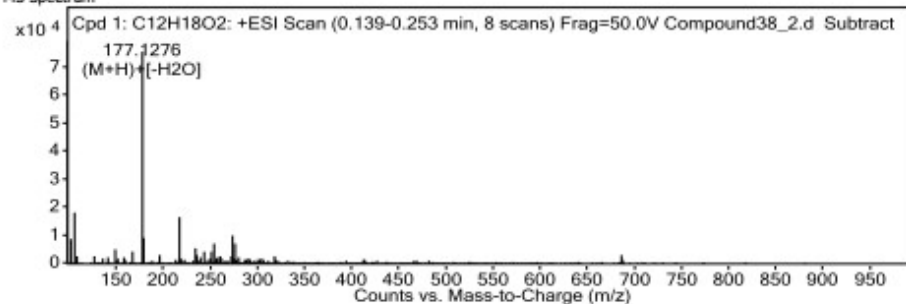

## Qualitative Compound Report

### MS Zoomed Spectrum

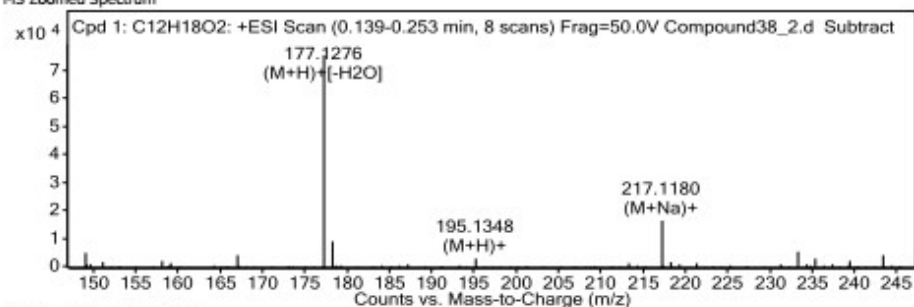

### MS Spectrum Peak List

| m/z      | Calc m/z | Diff(ppm) | z | Abund | Formula       | Ion           |
|----------|----------|-----------|---|-------|---------------|---------------|
| 175.9558 |          |           |   | 475   |               |               |
| 177.1276 | 177.1274 | 1.32      |   | 75519 | C12 H17 O     | (M+H)+(-H2O)  |
| 178.1305 | 178.1308 | -1.61     |   | 9340  | C12 H17 O     | (M+H)+(-H2O)  |
| 178.5861 |          |           |   | 769   |               |               |
| 179.1338 | 179.1337 | 0.81      |   | 920   | C12 H17 O     | (M+H)+(-H2O)  |
| 195.1348 | 195.138  | -15.98    | 1 | 3130  | C12 H19 O2    | (M+H)+        |
| 196.1376 | 196.1414 | -19.43    | 1 | 600   | C12 H19 O2    | (M+H)+        |
| 199.1132 | 199.1093 | 19.45     | 1 | 55    | C12 H16 Na O  | (M+Na)+(-H2O) |
| 217.118  | 217.1199 | -8.99     | 1 | 16707 | C12 H18 Na O2 | (M+Na)+       |
| 218.121  | 218.1233 | -10.69    | 1 | 2247  | C12 H18 Na O2 | (M+Na)+       |

--- End Of Report ---

Figure S43: MS spectrum of compound 5

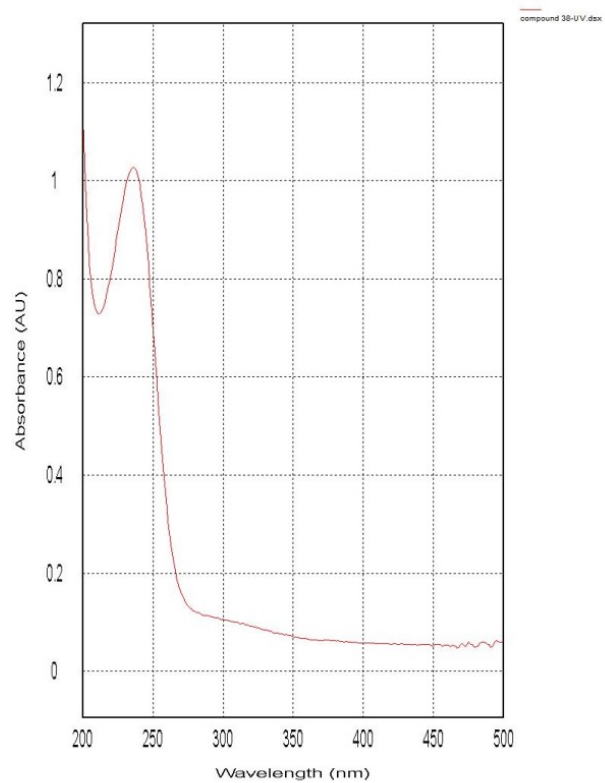

Figure S44: UV spectrum of compound **5**

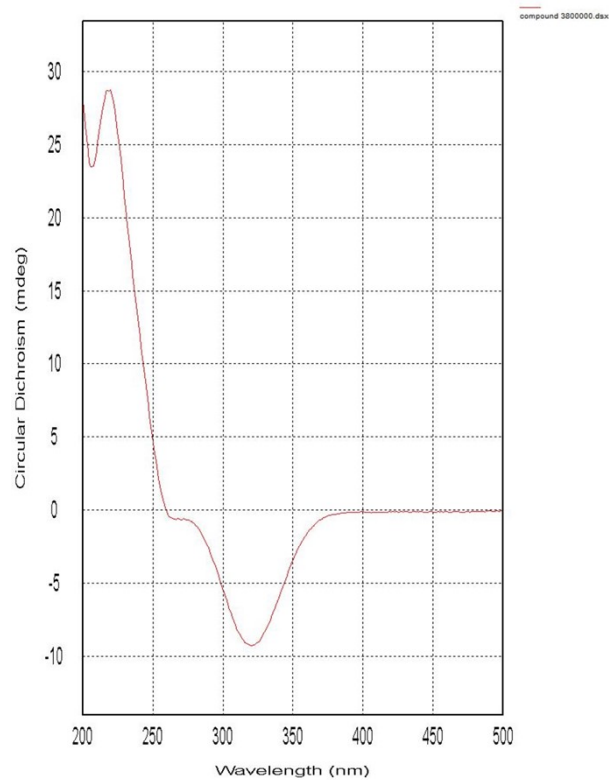

Figure S45: Experimental ECD spectrum of compound **5**

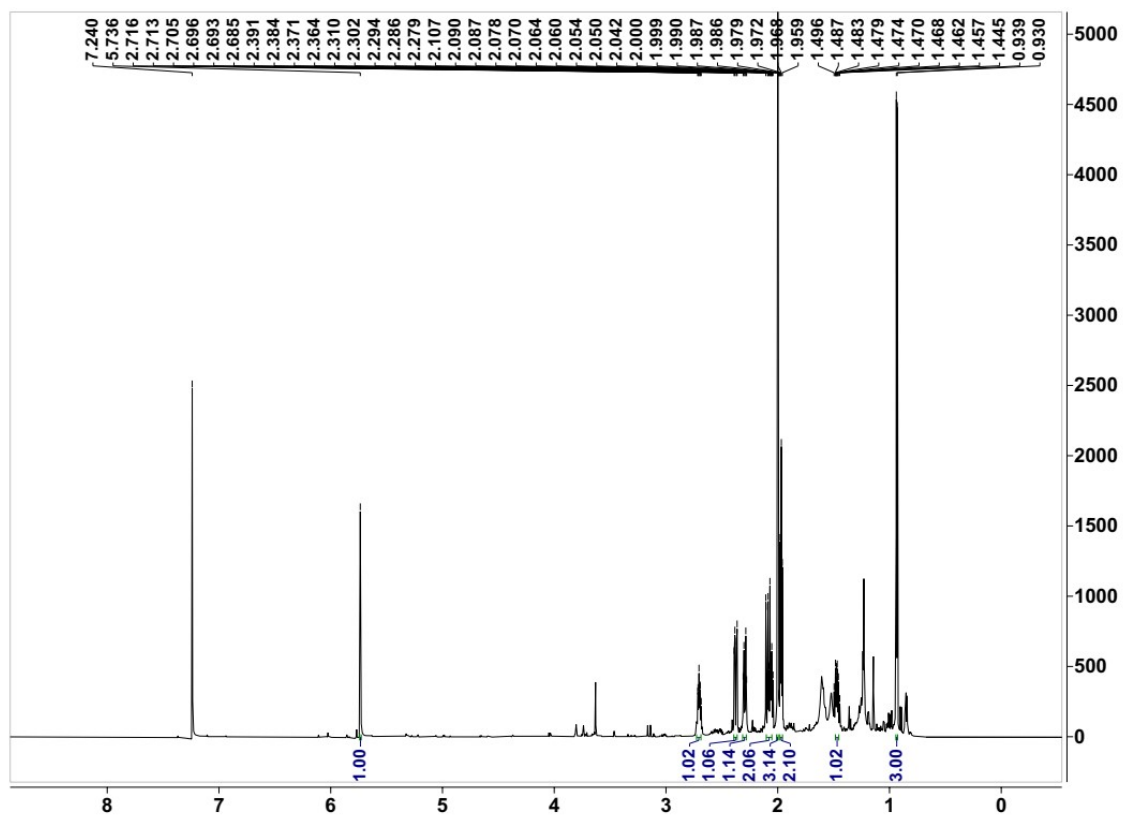

Figure S46:  $^1\text{H}$  NMR spectrum of compound **6** in  $\text{CDCl}_3$  (800 MHz)

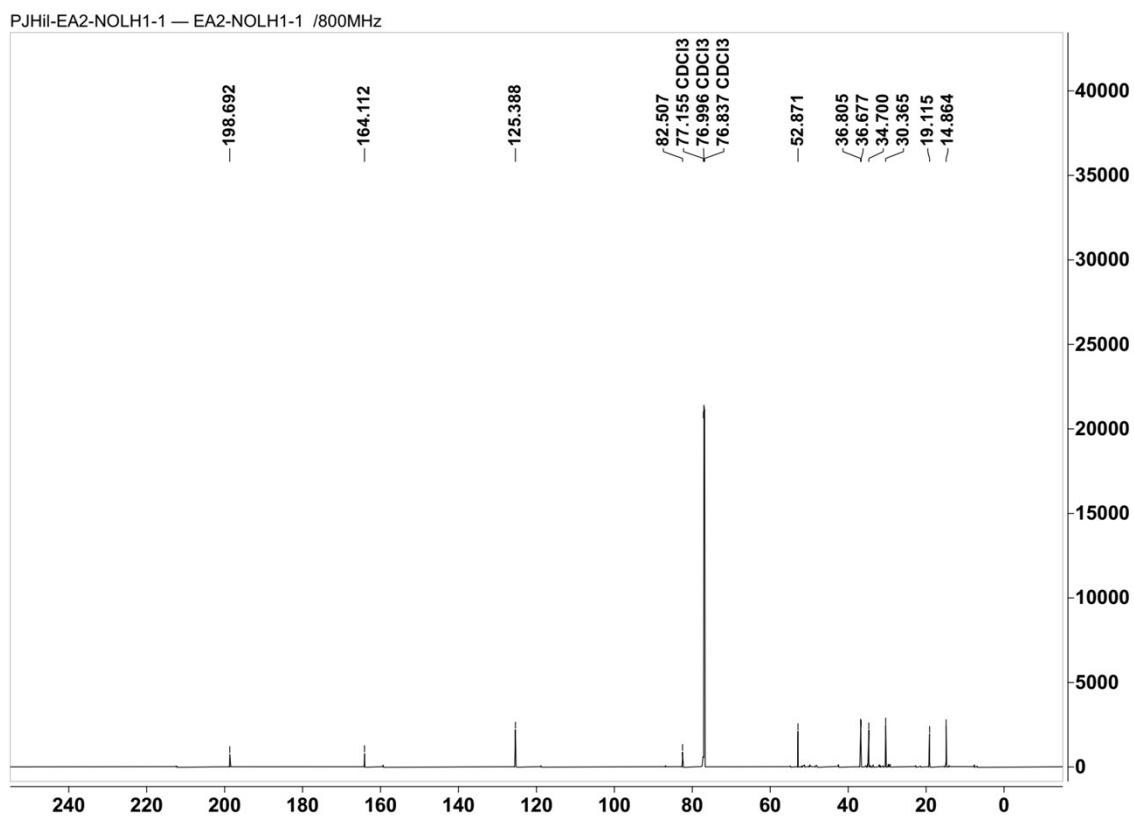

Figure S47:  $^{13}\text{C}$  NMR spectrum of compound **6** in  $\text{CDCl}_3$  (800 MHz)

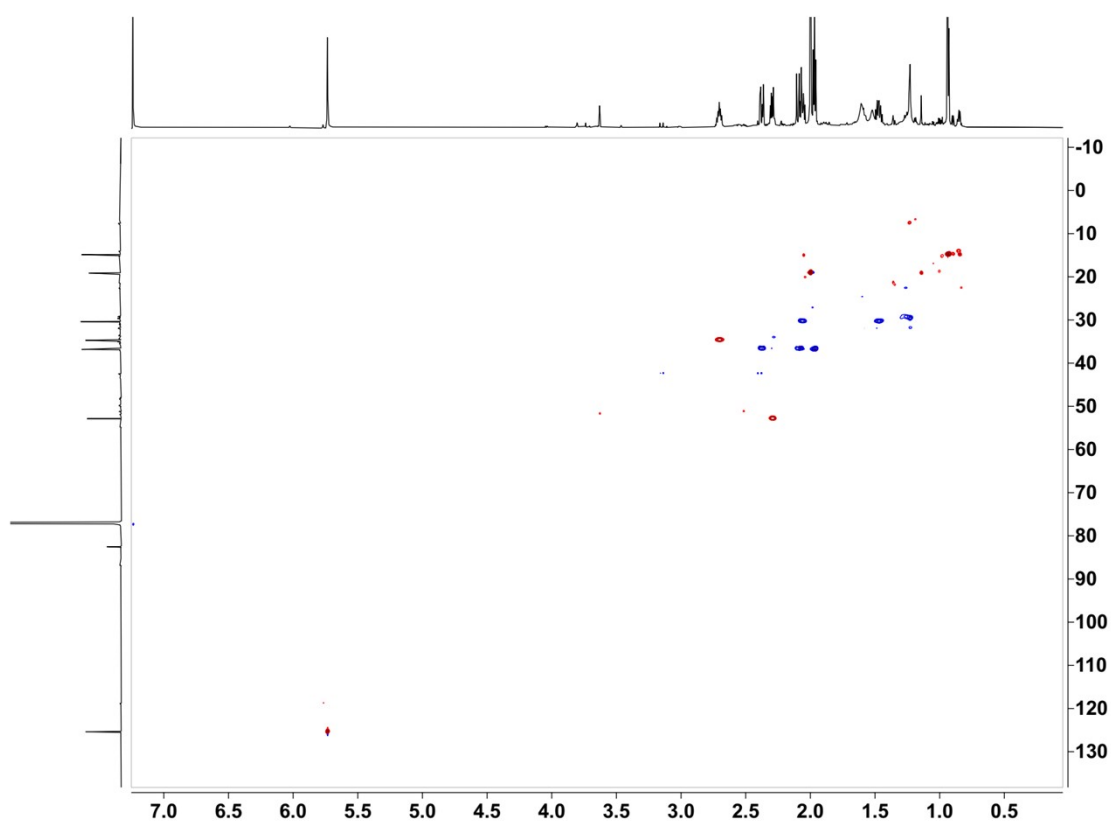

Figure S48: HSQC spectrum of compound **6** in  $\text{CDCl}_3$  (800 MHz)

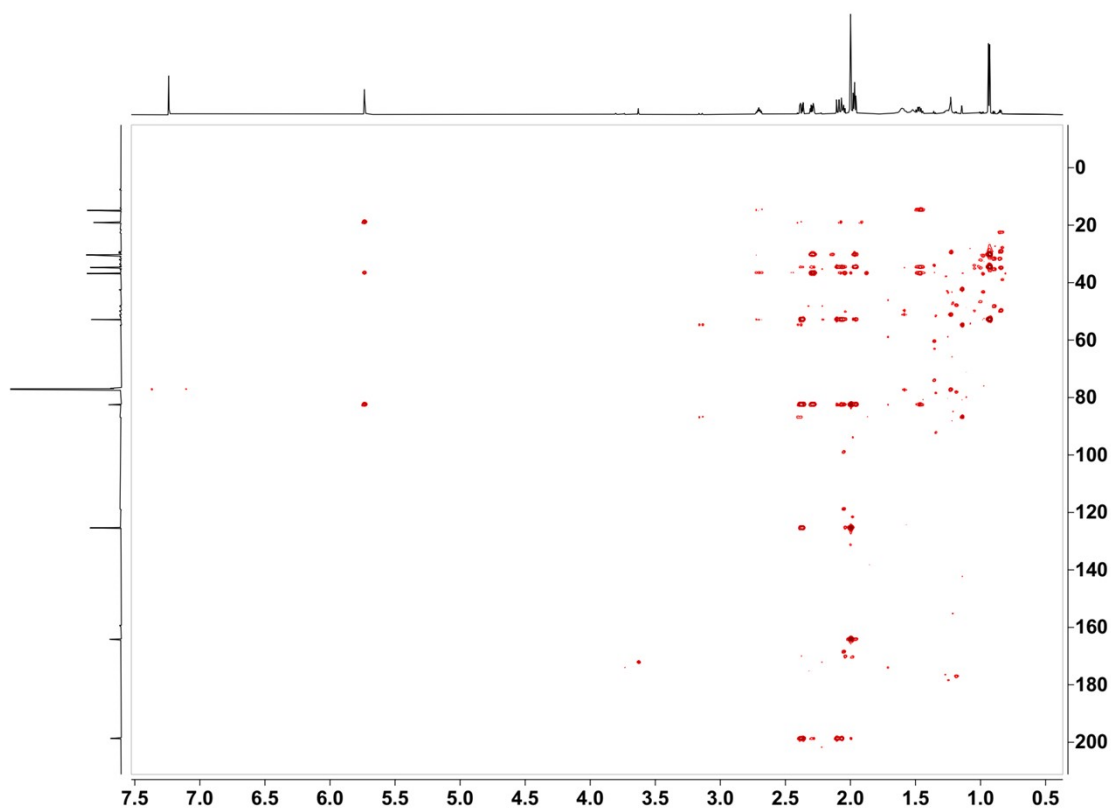

Figure S49: HMBC spectrum of compound **6** in  $\text{CDCl}_3$  (800 MHz)

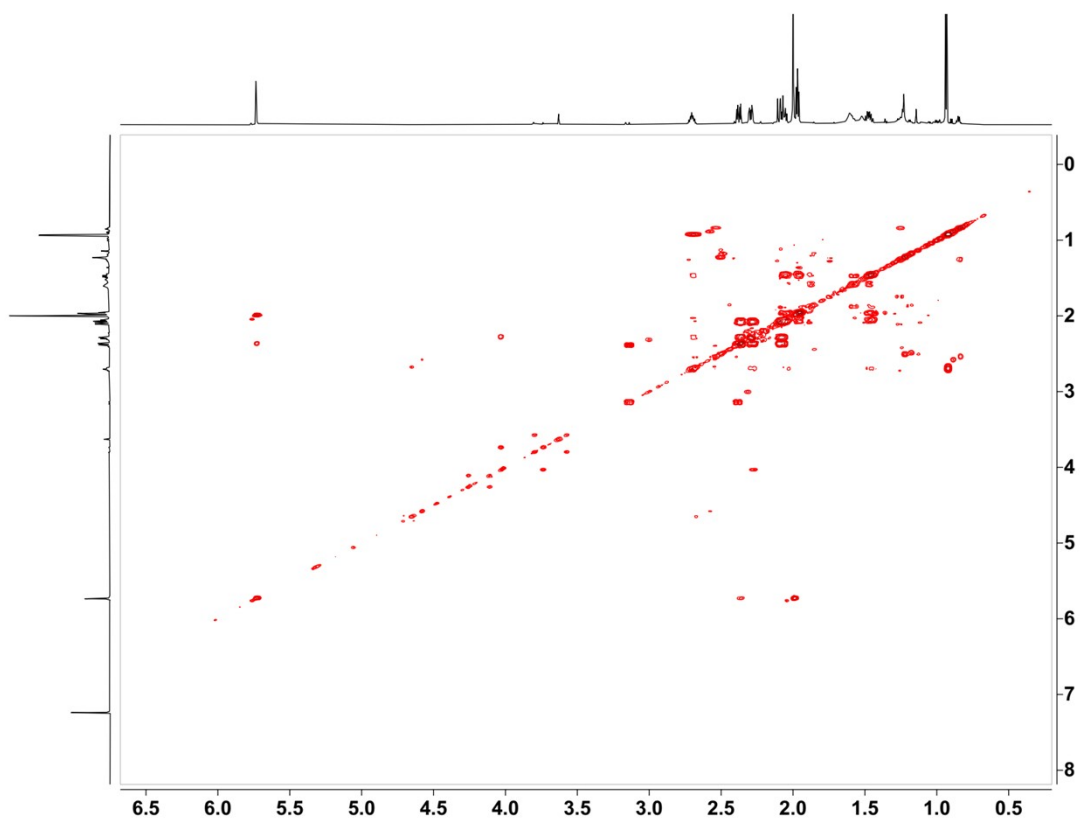

Figure S50: COSY spectrum of compound **6** in CDCl<sub>3</sub> (800 MHz)

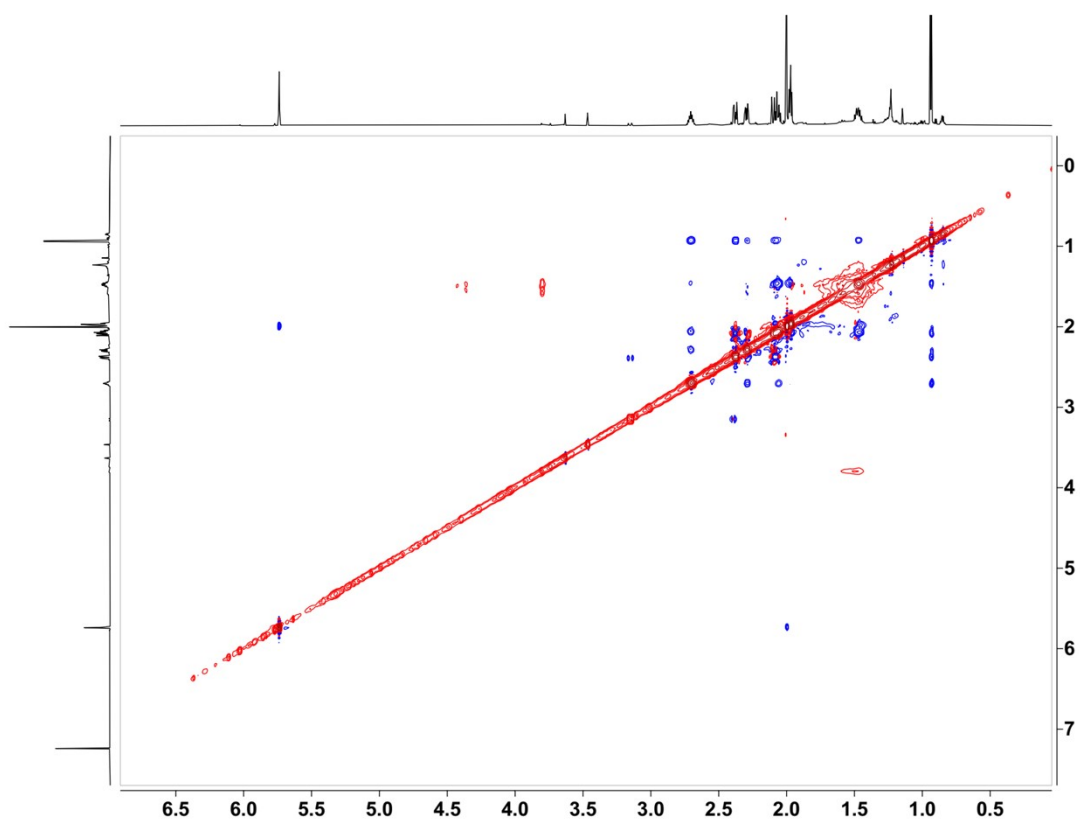

Figure S51: NOESY spectrum of compound **6** in CDCl<sub>3</sub> (800 MHz)

# Compound Table

| Compound Label  | RT    | Mass     | Abund  | Formula  | Tgt Mass | Diff (ppm) |
|-----------------|-------|----------|--------|----------|----------|------------|
| Cpd 1: C11H16O2 | 0.171 | 180.1149 | 142708 | C11H16O2 | 180.115  | -0.7       |

| Compound Label  | RT    | Algorithm       | Mass     |
|-----------------|-------|-----------------|----------|
| Cpd 1: C11H16O2 | 0.171 | Find By Formula | 180.1149 |

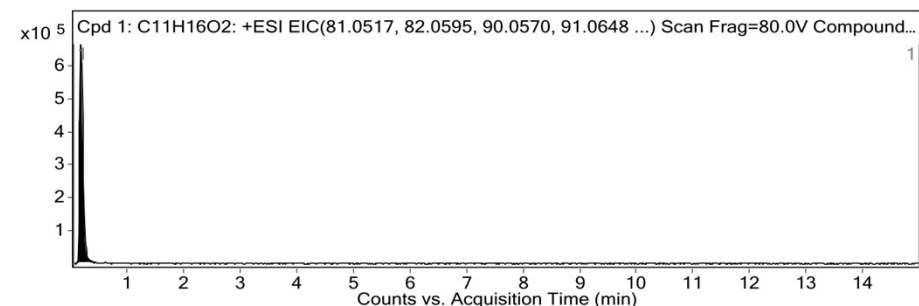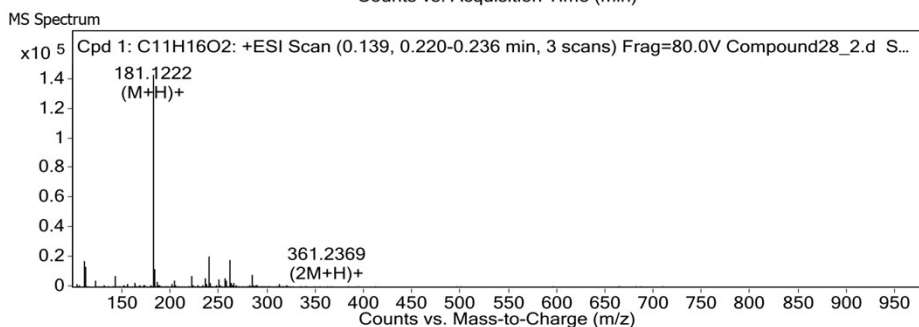

## Qualitative Compound Report

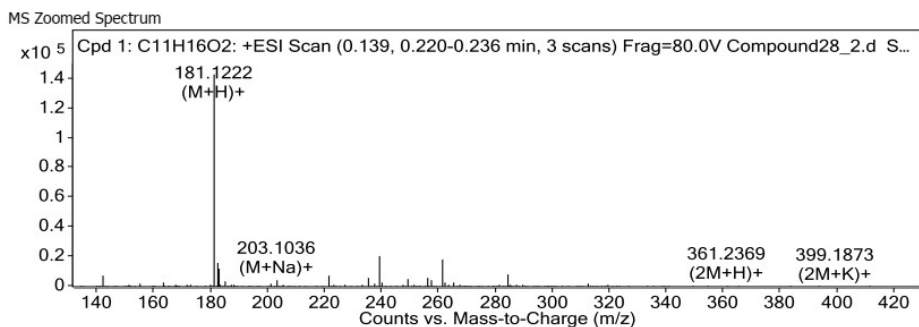

### MS Spectrum Peak List

| m/z      | Calc m/z | Diff(ppm) | z | Abund  | Formula       | Ion           |
|----------|----------|-----------|---|--------|---------------|---------------|
| 163.1154 | 163.1117 | 22.51     | 1 | 3288   | C11 H15 O     | (M+H)+[-H2O]  |
| 180.1011 | 180.1145 | -74.22    |   | 374    | C11 H16 O2    | M*+           |
| 181.1222 | 181.1223 | -0.7      |   | 142708 | C11 H17 O2    | (M+H)+        |
| 185.0813 | 185.0937 | -66.99    |   | 209    | C11 H14 Na O  | (M+Na)+[-H2O] |
| 201.0628 | 201.0676 | -24.15    | 1 | 535    | C11 H14 K O   | (M+K)+[-H2O]  |
| 203.1036 | 203.1043 | -3.16     | 1 | 4513   | C11 H16 Na O2 | (M+Na)+       |
| 219.0808 | 219.0782 | 11.82     | 1 | 268    | C11 H16 K O2  | (M+K)+        |
| 360.2197 | 360.2295 | -27.3     | 1 | 194    | C22 H32 O4    | 2M*+          |
| 361.2369 | 361.2373 | -1.31     | 1 | 728    | C22 H33 O4    | (2M+H)+       |
| 383.2195 | 383.2193 | 0.52      | 1 | 519    | C22 H32 Na O4 | (2M+Na)+      |

--- End Of Report ---

Figure S52: MS spectrum of compound 6

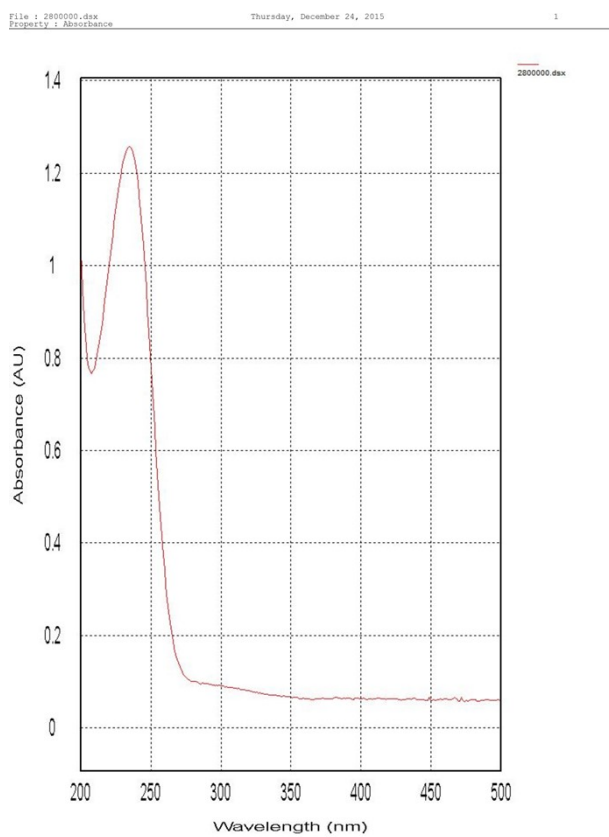

Figure S53: UV spectrum of compound **6**

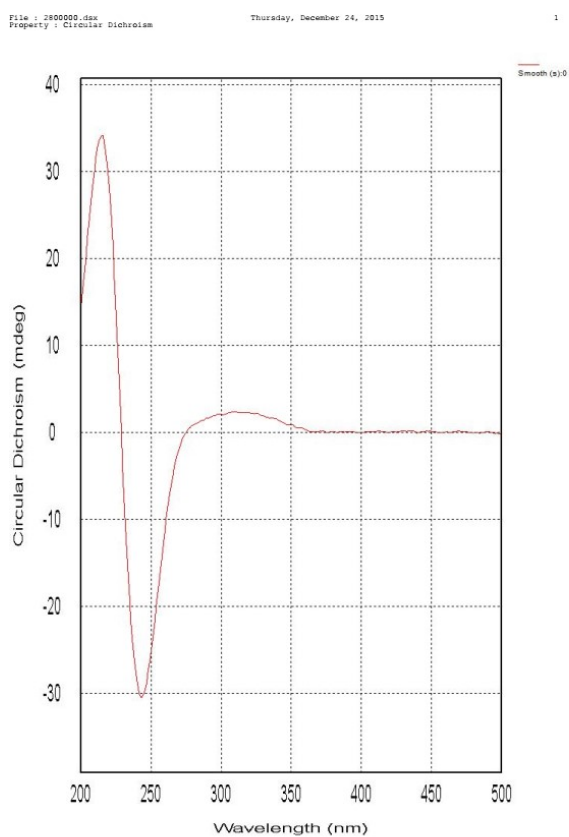

Figure S54: Experimental ECD spectrum of compound **6**

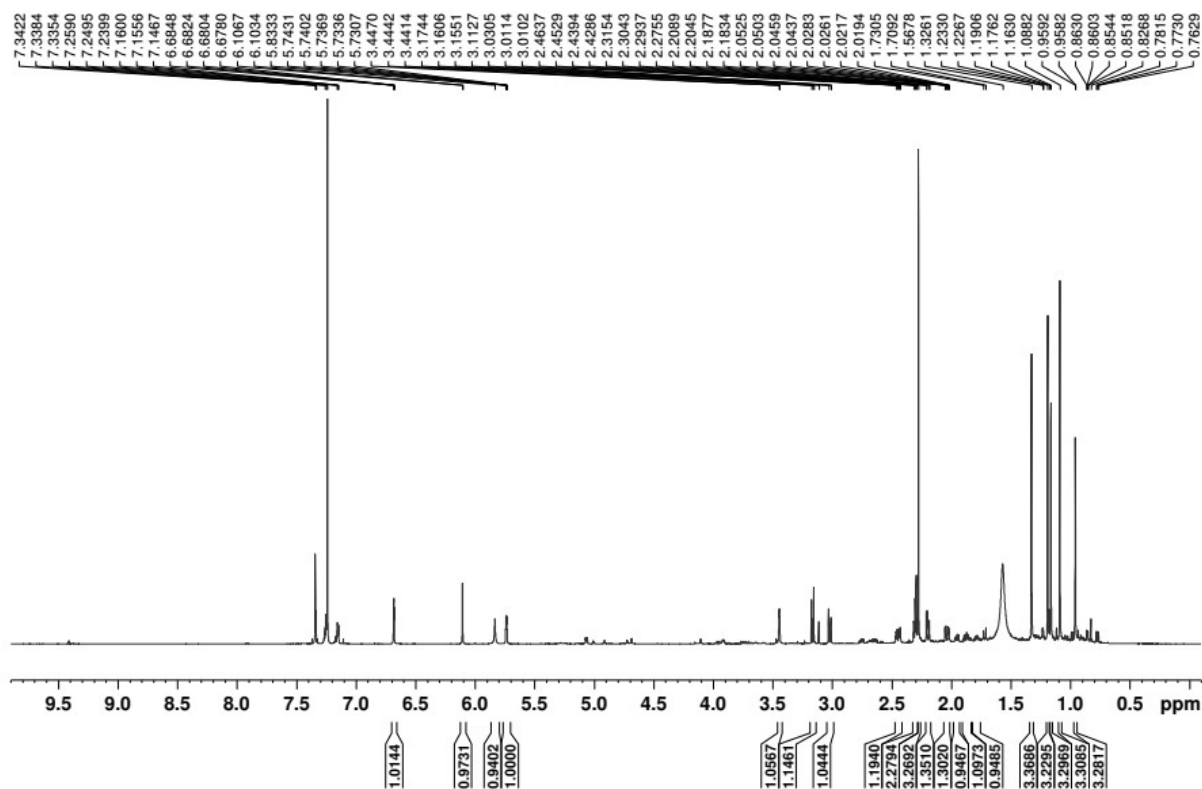

Figure S55:  $^1\text{H}$  NMR spectrum of compound **7** in  $\text{CDCl}_3$  (800 MHz)

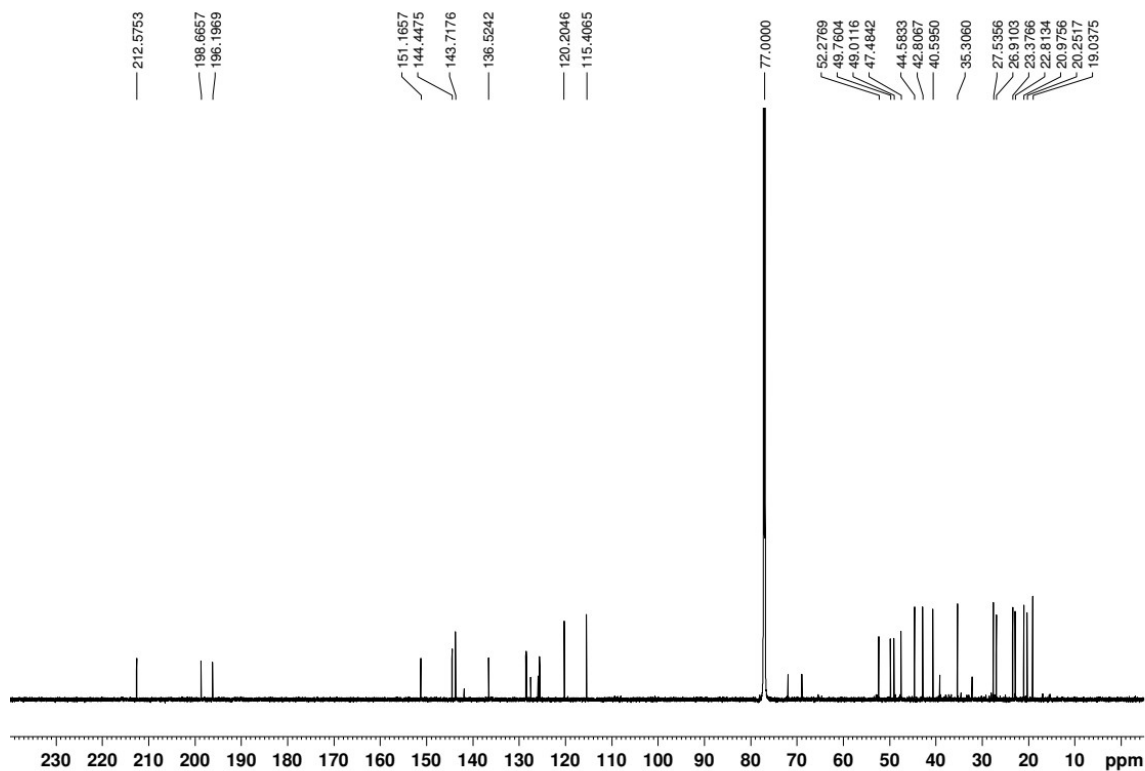

Figure S56:  $^{13}\text{C}$  NMR spectrum of compound **7** in  $\text{CDCl}_3$  (800 MHz)

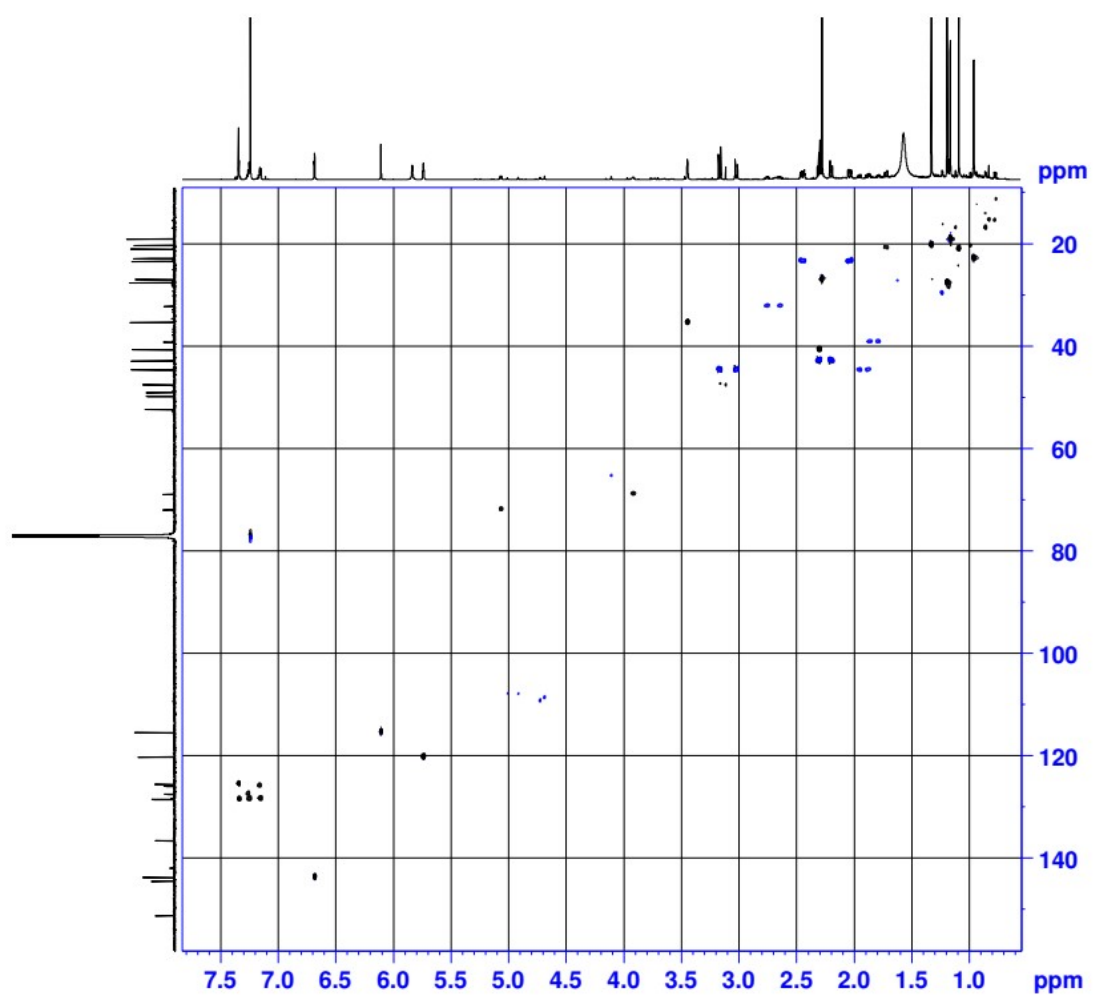

Figure S57: HSQC spectrum of compound **7** in  $\text{CDCl}_3$  (800 MHz)

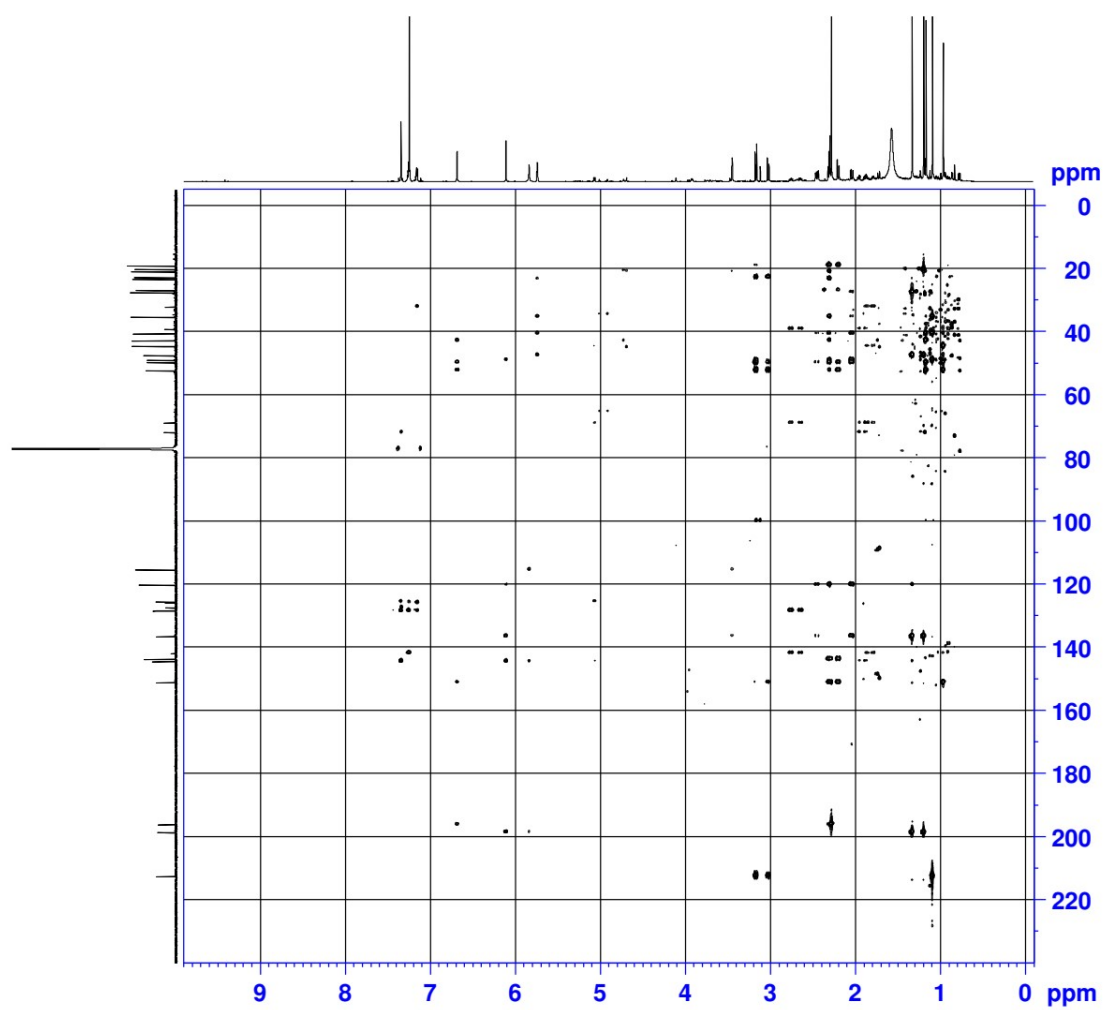

Figure S58: HMBC spectrum of compound **7** in  $\text{CDCl}_3$  (800 MHz)

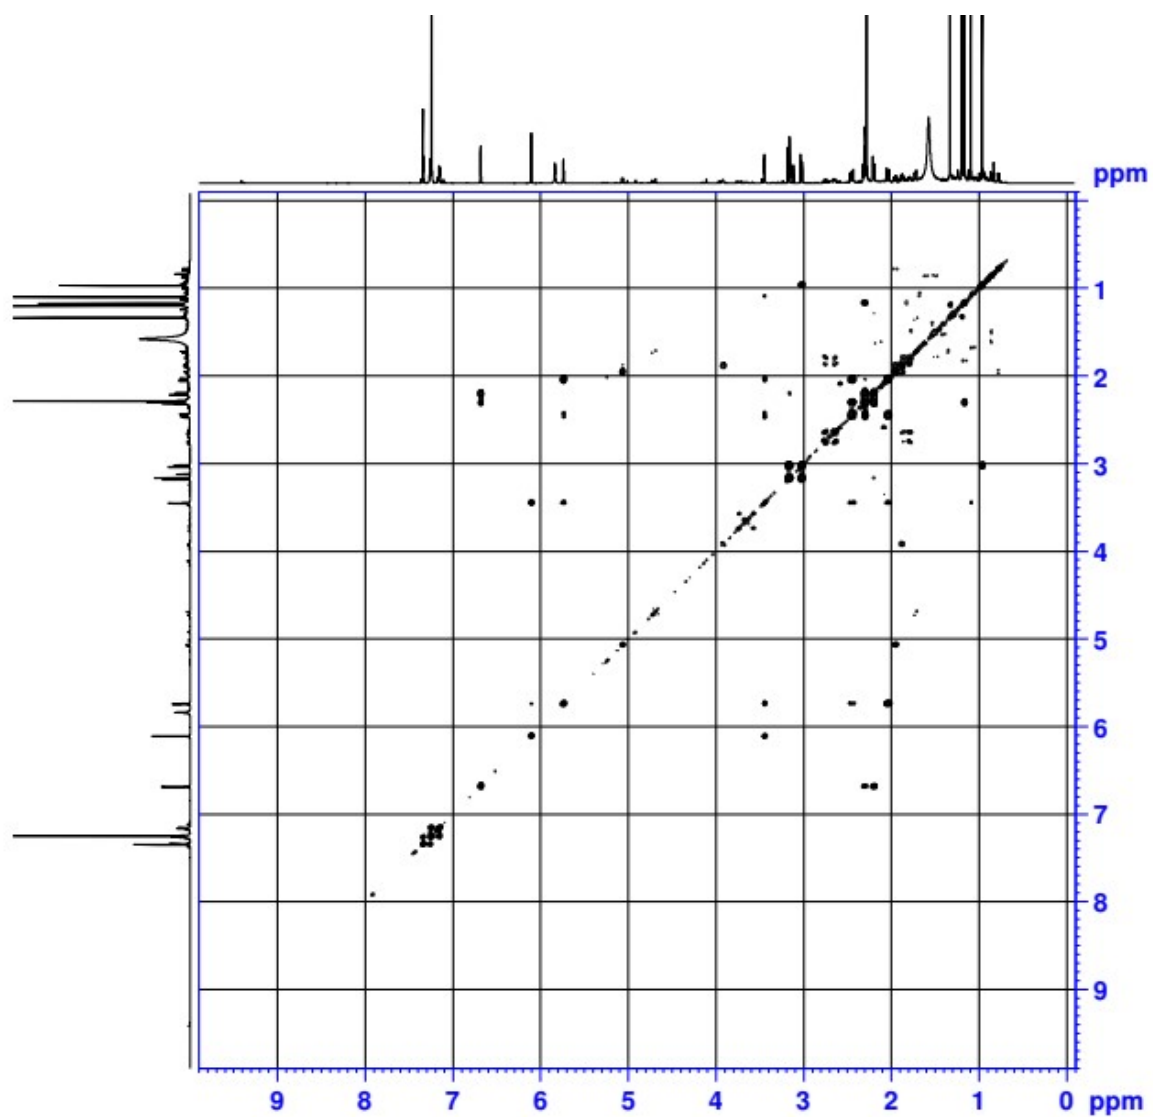

Figure S59: COSY spectrum of compound **7** in CDCl<sub>3</sub> (800 MHz)

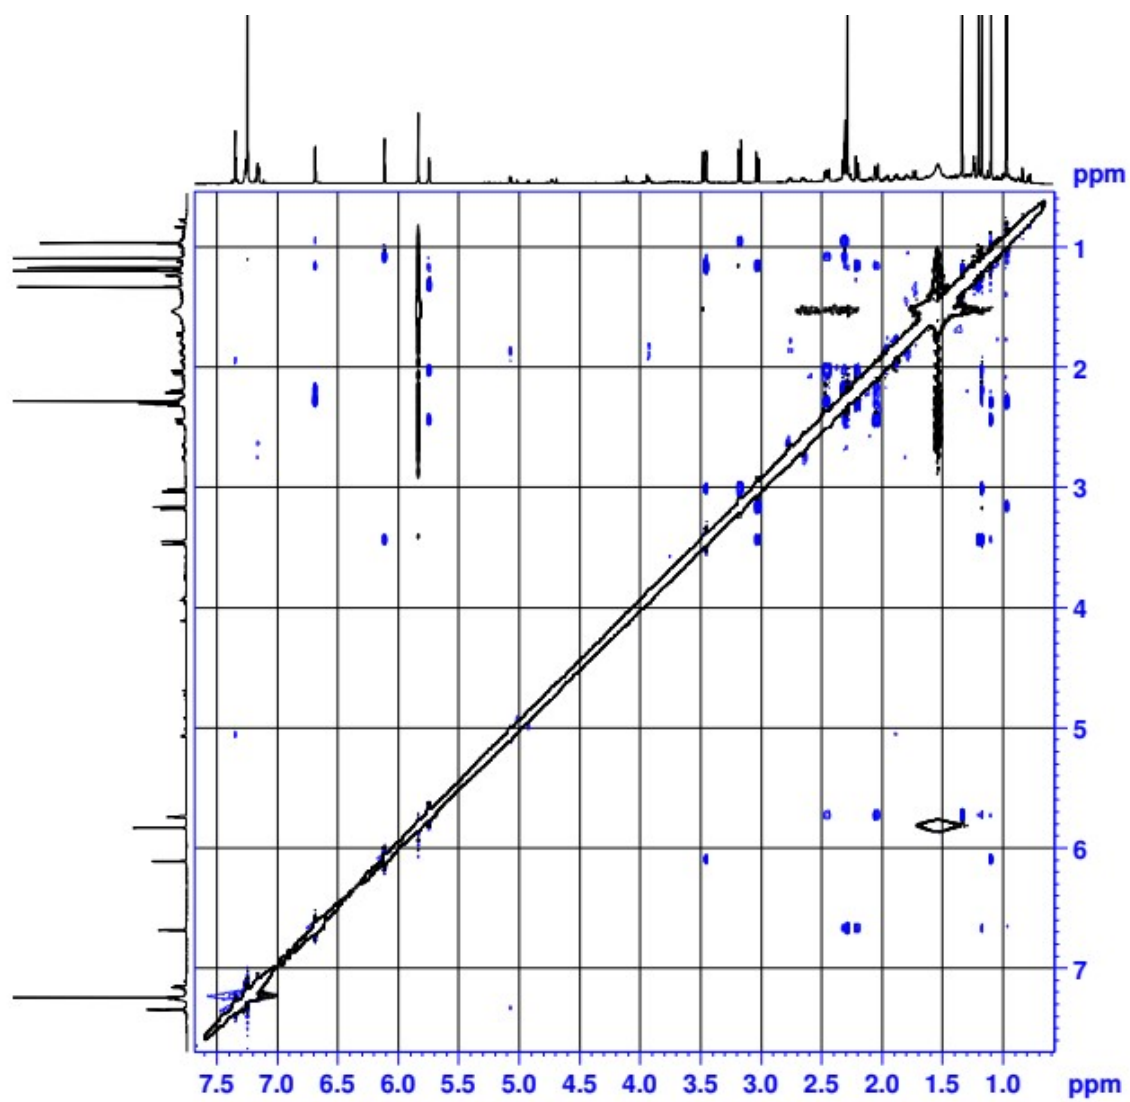

Figure S60: NOESY spectrum of compound **7** in  $\text{CDCl}_3$  (800 MHz)

# Compound Table

| Compound Label  | RT    | Mass     | Abund | Formula  | Tgt Mass | Diff (ppm) |
|-----------------|-------|----------|-------|----------|----------|------------|
| Cpd 1: C24H30O4 | 0.182 | 382.2131 | 64286 | C24H30O4 | 382.2144 | -3.31      |

| Compound Label  | RT    | Algorithm       | Mass     |
|-----------------|-------|-----------------|----------|
| Cpd 1: C24H30O4 | 0.182 | Find By Formula | 382.2131 |

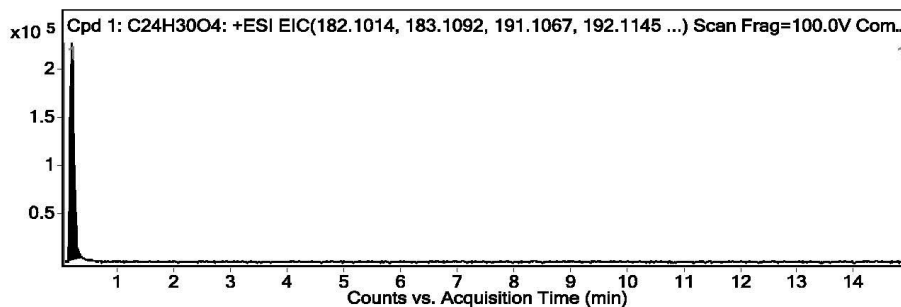

## MS Spectrum

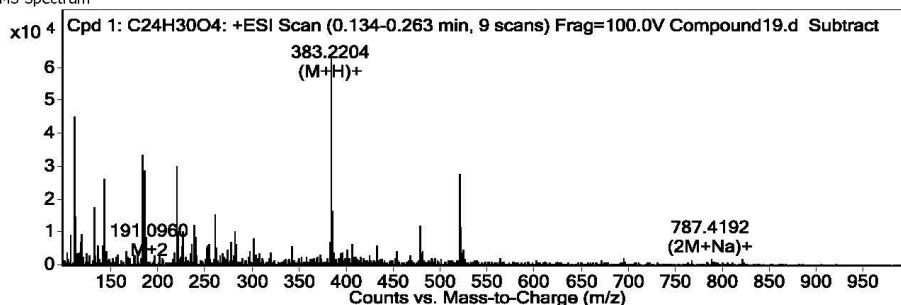

## Qualitative Compound Report

### MS Zoomed Spectrum

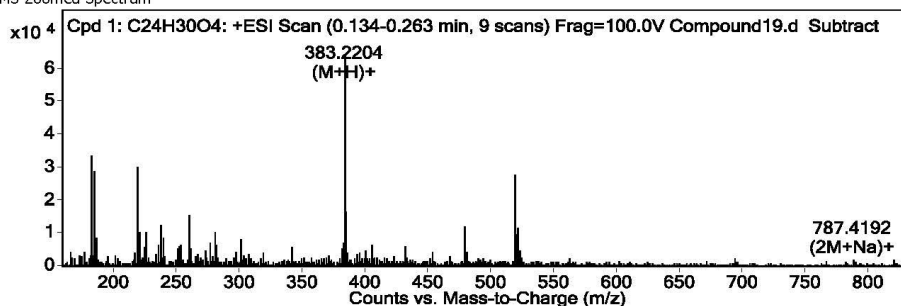

### MS Spectrum Peak List

| m/z      | Calc m/z | Diff(ppm) | z | Abund | Formula       | Ion            |
|----------|----------|-----------|---|-------|---------------|----------------|
| 191.096  | 191.1067 | -55.89    | 2 | 1101  | C24 H30 O4    | M+2            |
| 209.1418 | 209.141  | 3.58      | 2 | 915   | C24 H38 N2 O4 | (M+2(NH4))+2   |
| 382.2131 | 382.2139 | -2.12     |   | 7362  | C24 H30 O4    | M*+            |
| 383.2204 | 383.2217 | -3.34     |   | 64286 | C24 H31 O4    | (M+H)+         |
| 387.2036 | 387.1931 | 27.16     |   | 1992  | C24 H28 Na O3 | (M+Na)+ [-H2O] |
| 400.2462 | 400.2482 | -5.2      | 1 | 5036  | C24 H34 N O4  | (M+NH4)+       |
| 405.2043 | 405.2036 | 1.64      | 1 | 6755  | C24 H30 Na O4 | (M+Na)+        |
| 765.4323 | 765.4361 | -5.02     | 1 | 1658  | C48 H61 O8    | (2M+H)+        |
| 787.4192 | 787.418  | 1.44      | 1 | 2100  | C48 H60 Na O8 | (2M+Na)+       |
| 803.3983 | 803.392  | 7.93      | 1 | 1213  | C48 H60 K O8  | (2M+K)+        |

--- End Of Report ---

Figure S61: MS spectrum of compound 7

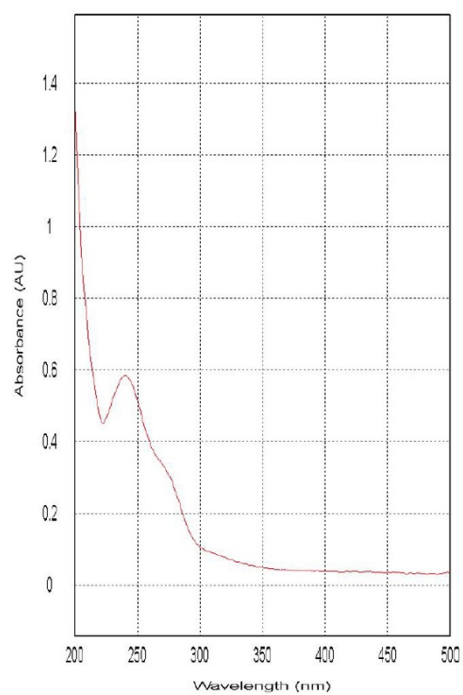

Figure S62: UV spectrum of compound **7**

**Table S1.** Calculated energy and Boltzmann distribution of compound **1** conformers

| Conformers  | B3-LYP/6-31G(d,p) Gibbs free energy (298.15 K) |                               |                             |
|-------------|------------------------------------------------|-------------------------------|-----------------------------|
|             | Calculated Energy<br>(Hartree)                 | Relative Energy<br>(kcal/mol) | Boltzmann population<br>(%) |
| <b>1-1</b>  | -885.219441                                    | 0.00                          | 10.1                        |
| <b>1-2</b>  | -885.220566                                    | -0.71                         | 33.2                        |
| <b>1-3</b>  | -885.218251                                    | 0.75                          | 2.9                         |
| <b>1-4</b>  | -885.220522                                    | -0.68                         | 31.7                        |
| <b>1-5</b>  | -885.217545                                    | 1.19                          | 1.4                         |
| <b>1-6</b>  | -885.219257                                    | 0.12                          | 8.3                         |
| <b>1-7</b>  | -885.217878                                    | 0.98                          | 1.9                         |
| <b>1-8</b>  | -885.217658                                    | 1.12                          | 1.5                         |
| <b>1-9</b>  | -885.219021                                    | 0.26                          | 6.5                         |
| <b>1-10</b> | -885.215936                                    | 2.20                          | 0.2                         |
| <b>1-11</b> | -885.215727                                    | 2.33                          | 0.2                         |
| <b>1-12</b> | -885.217186                                    | 1.42                          | 0.9                         |
| <b>1-13</b> | -885.214478                                    | 3.11                          | 0.1                         |
| <b>1-14</b> | -885.217365                                    | 1.30                          | 1.1                         |

**Table S2.** Calculated energy and Boltzmann distribution of compound **2** conformers

| Conformers | B3-LYP/6-31G(d,p) Gibbs free energy (298.15 K) |                               |                             |
|------------|------------------------------------------------|-------------------------------|-----------------------------|
|            | Calculated Energy<br>(Hartree)                 | Relative Energy<br>(kcal/mol) | Boltzmann population<br>(%) |
| <b>2-1</b> | -997.300119                                    | 0.00                          | 41.2                        |
| <b>2-2</b> | -997.300454                                    | -0.21                         | 58.8                        |

**Table S3.** Calculated energy and Boltzmann distribution of compound **3** conformers

| Conformers  | B3-LYP/6-31G(d,p) Gibbs free energy (298.15 K) |                               |                             |
|-------------|------------------------------------------------|-------------------------------|-----------------------------|
|             | Calculated Energy<br>(Hartree)                 | Relative Energy<br>(kcal/mol) | Boltzmann population<br>(%) |
| <b>3-1</b>  | -811.191694                                    | 0.00                          | 6.3                         |
| <b>3-2</b>  | -811.192087                                    | -0.25                         | 9.6                         |
| <b>3-3</b>  | -811.191096                                    | 0.38                          | 3.4                         |
| <b>3-4</b>  | -811.192485                                    | -0.50                         | 14.6                        |
| <b>3-5</b>  | -811.192292                                    | -0.38                         | 11.9                        |
| <b>3-6</b>  | -811.191537                                    | 0.10                          | 5.4                         |
| <b>3-7</b>  | -811.192803                                    | -0.70                         | 20.5                        |
| <b>3-8</b>  | -811.193014                                    | -0.83                         | 25.6                        |
| <b>3-9</b>  | -811.187355                                    | 2.72                          | 0.1                         |
| <b>3-10</b> | -811.190739                                    | 0.60                          | 2.3                         |
| <b>3-11</b> | -811.188199                                    | 2.19                          | 0.2                         |
| <b>3-12</b> | -811.186854                                    | 3.04                          | 0.00                        |
| <b>3-13</b> | -811.186101                                    | 3.51                          | 0.00                        |
| <b>3-14</b> | -811.186448                                    | 3.29                          | 0.00                        |
| <b>3-15</b> | -811.187265                                    | 2.78                          | 0.01                        |

**Table S4.** Calculated energy and Boltzmann distribution of compound **4** conformers

| Conformers | B3-LYP/6-31G(d,p) Gibbs free energy (298.15 K) |                            |                          |
|------------|------------------------------------------------|----------------------------|--------------------------|
|            | Calculated Energy<br>(Hartree)                 | Relative Energy (kcal/mol) | Boltzmann population (%) |
| <b>4-1</b> | -736.042562                                    | 0.00                       | 56.4                     |
| <b>4-2</b> | -736.042200                                    | 0.23                       | 38.5                     |
| <b>4-3</b> | -736.040131                                    | 1.53                       | 4.3                      |
| <b>4-4</b> | -736.038480                                    | 2.56                       | 0.7                      |
| <b>4-5</b> | -736.036437                                    | 3.84                       | 0.1                      |

**Table S5.** Calculated energy and Boltzmann distribution of compound **5** conformers

| B3-LYP/6-31G(d,p) Gibbs free energy (298.15 K) |                                |                               |                             |
|------------------------------------------------|--------------------------------|-------------------------------|-----------------------------|
| Conformers                                     | Calculated Energy<br>(Hartree) | Relative Energy<br>(kcal/mol) | Boltzmann population<br>(%) |
| <b>5-1</b>                                     | -618.1680236                   | 0.00                          | 46.3                        |
| <b>5-2</b>                                     | -618.1634657                   | 2.86                          | 0.4                         |
| <b>5-3</b>                                     | -618.1639011                   | 2.59                          | 0.6                         |
| <b>5-4</b>                                     | -618.1650828                   | 1.85                          | 2.1                         |
| <b>5-5</b>                                     | -618.1631341                   | 3.07                          | 0.3                         |
| <b>5-6</b>                                     | -618.1631648                   | 3.05                          | 0.3                         |
| <b>5-7</b>                                     | -618.1680278                   | 0.00                          | 46.6                        |
| <b>5-8</b>                                     | -618.1613847                   | 4.17                          | 0.0                         |
| <b>5-9</b>                                     | -618.1603176                   | 4.84                          | 0.0                         |
| <b>5-10</b>                                    | -618.1650594                   | 1.86                          | 2.0                         |
| <b>5-11</b>                                    | -618.1632614                   | 2.99                          | 0.3                         |
| <b>5-12</b>                                    | -618.1645279                   | 2.19                          | 1.1                         |

**Table S6.** Calculated energy and Boltzmann distribution of compound **6** conformers

| B3-LYP/6-31G(d,p) Gibbs free energy (298.15 K) |                                |                               |                             |
|------------------------------------------------|--------------------------------|-------------------------------|-----------------------------|
| Conformers                                     | Calculated Energy<br>(Hartree) | Relative Energy<br>(kcal/mol) | Boltzmann population<br>(%) |
| <b>6-1</b>                                     | -578.896092                    | 0.00                          | 86.3                        |
| <b>6-2</b>                                     | -578.893187                    | 1.82                          | 4.0                         |
| <b>6-3</b>                                     | -578.893831                    | 1.42                          | 7.9                         |
| <b>6-4</b>                                     | -578.891596                    | 2.82                          | 0.7                         |
| <b>6-5</b>                                     | -578.889059                    | 4.41                          | 0.1                         |
| <b>6-6</b>                                     | -578.889994                    | 3.83                          | 0.1                         |
| <b>6-7</b>                                     | -578.891598                    | 2.82                          | 0.7                         |
| <b>6-8</b>                                     | -578.889727                    | 3.99                          | 0.1                         |
| <b>6-9</b>                                     | -578.889340                    | 4.24                          | 0.1                         |

**Table S7.** Crystal data and structure refinement for **7**

|                                             |                                                                |
|---------------------------------------------|----------------------------------------------------------------|
| Empirical formula                           | C <sub>25</sub> H <sub>34</sub> O <sub>5</sub>                 |
| Formula weight                              | 414.52                                                         |
| Temperature/K                               | 99.8(7)                                                        |
| Crystal system                              | orthorhombic                                                   |
| Space group                                 | P2 <sub>1</sub> 2 <sub>1</sub> 2 <sub>1</sub>                  |
| a/Å                                         | 10.0589(2)                                                     |
| b/Å                                         | 14.2921(3)                                                     |
| c/Å                                         | 15.1181(3)                                                     |
| $\alpha$ /°                                 | 90                                                             |
| $\beta$ /°                                  | 90                                                             |
| $\gamma$ /°                                 | 90                                                             |
| Volume/Å <sup>3</sup>                       | 2173.43(8)                                                     |
| Z                                           | 4                                                              |
| $\rho_{\text{calc}}$ /cm <sup>3</sup>       | 1.267                                                          |
| $\mu$ /mm <sup>-1</sup>                     | 0.697                                                          |
| F(000)                                      | 896.0                                                          |
| Crystal size/mm <sup>3</sup>                | 0.15 × 0.04 × 0.02                                             |
| Radiation                                   | CuK $\alpha$ ( $\lambda$ = 1.54184)                            |
| 2 $\Theta$ range for data collection/°      | 8.514 to 153.356                                               |
| Index ranges                                | -12 ≤ h ≤ 12, -17 ≤ k ≤ 15, -19 ≤ l ≤ 19                       |
| Reflections collected                       | 21475                                                          |
| Independent reflections                     | 4530 [ $R_{\text{int}}$ = 0.0390, $R_{\text{sigma}}$ = 0.0242] |
| Data/restraints/parameters                  | 4530/0/280                                                     |
| Goodness-of-fit on F <sup>2</sup>           | 1.067                                                          |
| Final R indexes [ $I \geq 2\sigma(I)$ ]     | $R_1$ = 0.0369, $wR_2$ = 0.0976                                |
| Final R indexes [all data]                  | $R_1$ = 0.0382, $wR_2$ = 0.0987                                |
| Largest diff. peak/hole / e Å <sup>-3</sup> | 0.22/-0.24                                                     |
| Flack parameter                             | -0.01(8)                                                       |
